# Supplementary material
Source: PubMed Central journal article supplement (PMC2783591)
Supplement: NIHMS147990-supplement-1.pdf [file NIHMS147990-supplement-1.pdf]

Figure 2 Top Panel

| Expression in Units of Standard Deviation from Median | Cancer = 1, NonCancer = 0 | Moving Average of Cancer Frequency (Averaged over 150 nearest neighbor expression measurements) |
|-------------------------------------------------------|---------------------------|-------------------------------------------------------------------------------------------------|
| -4.180796016                                          | 0                         | 0.565789474                                                                                     |
| -3.196052414                                          | 0                         | 0.558441558                                                                                     |
| -3.174431012                                          | 0                         | 0.564102564                                                                                     |
| -3.1269651216                                         | 1                         | 0.556962025                                                                                     |
| -2.90382557                                           | 0                         | 0.5625                                                                                          |
| -2.827460618                                          | 1                         | 0.555555556                                                                                     |
| -2.827281553                                          | 1                         | 0.548780488                                                                                     |
| -2.797686743                                          | 1                         | 0.542168675                                                                                     |
| -2.765851478                                          | 1                         | 0.5357714286                                                                                    |
| -2.765367455                                          | 1                         | 0.541176471                                                                                     |
| -2.744546584                                          | 1                         | 0.534883721                                                                                     |
| -2.577423128                                          | 1                         | 0.528735632                                                                                     |
| -2.525690347                                          | 1                         | 0.534090909                                                                                     |
| -2.525690347                                          | 1                         | 0.528089888                                                                                     |
| -2.299367409                                          | 0                         | 0.533333333                                                                                     |
| -2.233772257                                          | 0                         | 0.527472527                                                                                     |
| -2.233741925                                          | 0                         | 0.532608696                                                                                     |
| -2.201938408                                          | 1                         | 0.526881172                                                                                     |
| -2.188328099                                          | 1                         | 0.531914894                                                                                     |
| -2.176412551                                          | 1                         | 0.5368842105                                                                                    |
| -2.123632009                                          | 0                         | 0.53125                                                                                         |
| -2.10574154                                           | 1                         | 0.536082474                                                                                     |
| -2.10040098                                           | 0                         | 0.540816327                                                                                     |
| -2.021196573                                          | 0                         | 0.535353535                                                                                     |
| -1.956228488                                          | 0                         | 0.53                                                                                            |
| -1.952388806                                          | 0                         | 0.534653465                                                                                     |
| -1.950981576                                          | 0                         | 0.539215686                                                                                     |
| -1.948722121                                          | 1                         | 0.54368932                                                                                      |
| -1.94846923                                           | 1                         | 0.548076923                                                                                     |
| -1.935271955                                          | 1                         | 0.542857143                                                                                     |
| -1.921393834                                          | 0                         | 0.547169811                                                                                     |
| -1.914308214                                          | 1                         | 0.542056075                                                                                     |
| -1.876889491                                          | 1                         | 0.537037037                                                                                     |
| -1.87432664                                           | 1                         | 0.532110092                                                                                     |
| -1.873203055                                          | 0                         | 0.527272727                                                                                     |
| -1.868422475                                          | 1                         | 0.522525252                                                                                     |
| -1.840234678                                          | 1                         | 0.526785714                                                                                     |
| -1.801530027                                          | 1                         | 0.530973451                                                                                     |
| -1.7359074851                                         | 0                         | 0.535087719                                                                                     |
| -1.707461226                                          | 1                         | 0.530434783                                                                                     |
| -1.705557586                                          | 1                         | 0.534482759                                                                                     |
| -1.700113528                                          | 0                         | 0.52991453                                                                                      |
| -1.68475702                                           | 0                         | 0.533896305                                                                                     |
| -1.670175418                                          | 1                         | 0.529411765                                                                                     |
| -1.65992348                                           | 1                         | 0.525                                                                                           |
| -1.657990234                                          | 1                         | 0.520661157                                                                                     |
| -1.657990234                                          | 1                         | 0.516393443                                                                                     |
| -1.629500611                                          | 0                         | 0.520325203                                                                                     |
| -1.598447255                                          | 1                         | 0.516129032                                                                                     |
| -1.59825971                                           | 0                         | 0.52                                                                                            |
| -1.583459833                                          | 0                         | 0.515873016                                                                                     |
| -1.567936621                                          | 1                         | 0.519685039                                                                                     |
| -1.532356658                                          | 1                         | 0.5234375                                                                                       |
| -1.527027102                                          | 0                         | 0.527131783                                                                                     |
| -1.521933335                                          | 0                         | 0.530769231                                                                                     |
| -1.521933335                                          | 0                         | 0.534351145                                                                                     |
| -1.521933335                                          | 0                         | 0.537878788                                                                                     |
| -1.521933335                                          | 0                         | 0.541353383                                                                                     |
| -1.486848493                                          | 0                         | 0.537313433                                                                                     |
| -1.483167171                                          | 0                         | 0.540740741                                                                                     |
| -1.47852272                                           | 0                         | 0.536764706                                                                                     |
| -1.468539493                                          | 0                         | 0.532846715                                                                                     |
| -1.456503521                                          | 1                         | 0.536231884                                                                                     |
| -1.451980674                                          | 1                         | 0.539685345                                                                                     |
| -1.442516313                                          | 1                         | 0.542857143                                                                                     |
| -1.442516313                                          | 1                         | 0.539007092                                                                                     |
| -1.442516313                                          | 1                         | 0.535211268                                                                                     |
| -1.437132836                                          | 0                         | 0.531468531                                                                                     |
| -1.424243459                                          | 0                         | 0.534722222                                                                                     |
| -1.418205256                                          | 1                         | 0.531034483                                                                                     |
|                                                       | 0                         | 0.52739728                                                                                      |
|                                                       | 1                         | 0.530612245                                                                                     |

Figure 2 Bottom Panel

| Non-Cancer | Cancer | Expression Stdev Bn | Frequency | Fractionally normalized to 1 | Moving average window of 11 | Expression Stdev Bn | Frequency | Fractionally normalized to 1 | Moving average window of 11 |
|------------|--------|---------------------|-----------|------------------------------|-----------------------------|---------------------|-----------|------------------------------|-----------------------------|
| -5         | 0      | 0                   | 0         | 0                            | 0                           | -5                  | 0         | 0                            | 0                           |
| -4.9       | 0      | 0                   | 0         | 0                            | 0                           | -4.9                | 0         | 0                            | 0                           |
| -4.8       | 0      | 0                   | 0         | 0                            | 0                           | -4.8                | 0         | 0                            | 0                           |
| -4.7       | 0      | 0                   | 0         | 0                            | 0                           | -4.7                | 0         | 0                            | 0                           |
| -4.6       | 0      | 0                   | 0         | 0                            | 0                           | -4.6                | 0         | 0                            | 0                           |
| -4.5       | 0      | 0.000157729         | 0         | 0                            | 0.000157729                 | -4.5                | 0         | 0                            | 0                           |
| -4.4       | 0      | 0.00014339          | 0         | 0                            | 0.00014339                  | -4.4                | 0         | 0                            | 0                           |
| -4.3       | 0      | 0.00014339          | 0         | 0                            | 0.00014339                  | -4.3                | 0         | 0                            | 0                           |
| -4.2       | 0      | 0.00014339          | 0         | 0                            | 0.00014339                  | -4.2                | 0         | 0                            | 0                           |
| -4.1       | 0      | 0.001577287         | 1         | 0.001577287                  | 0.001577287                 | -4.1                | 0         | 0                            | 0                           |
| -4         | 0      | 0                   | 0         | 0                            | 0                           | -4                  | 0         | 0                            | 0                           |
| -3.9       | 0      | 0                   | 0         | 0                            | 0                           | -3.9                | 0         | 0                            | 0                           |
| -3.8       | 0      | 0.00014339          | 0         | 0                            | 0.00014339                  | -3.8                | 0         | 0                            | 0                           |
| -3.7       | 0      | 0.00014339          | 0         | 0                            | 0.00014339                  | -3.7                | 0         | 0                            | 0                           |
| -3.6       | 0      | 0.000430169         | 0         | 0                            | 0.000430169                 | -3.6                | 0         | 0                            | 0                           |
| -3.5       | 0      | 0.00286779          | 0         | 0                            | 0.00286779                  | -3.5                | 0         | 0                            | 0                           |
| -3.4       | 0      | 0.000430169         | 0         | 0                            | 0.000430169                 | -3.4                | 0         | 0                            | 0                           |
| -3.3       | 0      | 0.000430169         | 0         | 0                            | 0.000430169                 | -3.3                | 0         | 0                            | 0                           |
| -3.2       | 0      | 0.000430169         | 0         | 0                            | 0.000430169                 | -3.2                | 0         | 0                            | 0                           |
| -3.1       | 1      | 0.003154574         | 2         | 0.003154574                  | 0.003154574                 | -3.1                | 1         | 0.001733102                  | 0                           |
| -3         | 0      | 0                   | 0         | 0                            | 0                           | -3                  | 0         | 0                            | 0                           |
| -2.9       | 1      | 0.001577287         | 1         | 0.001577287                  | 0.001577287                 | -2.9                | 0         | 0                            | 0                           |
| -2.8       | 0      | 0                   | 0         | 0                            | 0                           | -2.8                | 2         | 0.003466205                  | 0                           |
| -2.7       | 0      | 0                   | 0         | 0                            | 0                           | -2.7                | 4         | 0.006932409                  | 0                           |
| -2.6       | 0      | 0                   | 0         | 0                            | 0                           | -2.6                | 0         | 0                            | 0                           |
| -2.4       | 0      | 0                   | 0         | 0                            | 0                           | -2.4                | 0         | 0                            | 0                           |
| -2.3       | 0      | 0.001864067         | 0         | 0                            | 0.001864067                 | -2.3                | 0         | 0                            | 0                           |
| -2.2       | 1      | 0.002150846         | 2         | 0.002150846                  | 0.002150846                 | -2.2                | 1         | 0.001733102                  | 0                           |
| -2.1       | 3      | 0.003011184         | 3         | 0.003011184                  | 0.003011184                 | -2.1                | 2         | 0.003466205                  | 0                           |
| -2         | 1      | 0.0055922           | 1         | 0.0055922                    | 0.0055922                   | -2                  | 0         | 0                            | 0                           |
| -1.9       | 5      | 0.006882707         | 5         | 0.006882707                  | 0.006882707                 | -1.9                | 3         | 0.005199307                  | 0                           |
| -1.8       | 2      | 0.003154574         | 2         | 0.003154574                  | 0.003154574                 | -1.8                | 5         | 0.00665511                   | 0                           |
| -1.7       | 2      | 0.003154574         | 2         | 0.003154574                  | 0.003154574                 | -1.7                | 2         | 0.003466205                  | 0                           |
| -1.6       | 4      | 0.006309148         | 4         | 0.006309148                  | 0.006309148                 | -1.6                | 5         | 0.00665511                   | 0                           |
| -1.5       | 4      | 0.01041009          | 4         | 0.01041009                   | 0.01041009                  | -1.5                | 6         | 0.010398614                  | 0                           |
| -1.4       | 7      | 0.01061084          | 7         | 0.01061084                   | 0.01061084                  | -1.4                | 6         | 0.010398614                  | 0                           |
| -1.3       | 11     | 0.012618297         | 11        | 0.012618297                  | 0.012618297                 | -1.3                | 8         | 0.013864818                  | 0                           |
| -1.2       | 9      | 0.01605965          | 9         | 0.01605965                   | 0.01605965                  | -1.2                | 10        | 0.017331023                  | 0                           |
| -1.1       | 9      | 0.014195584         | 9         | 0.014195584                  | 0.014195584                 | -1.1                | 8         | 0.013864818                  | 0                           |
| -1         | 9      | 0.02150846          | 9         | 0.02150846                   | 0.02150846                  | -1                  | 13        | 0.022530329                  | 0                           |
| -0.9       | 15     | 0.023085747         | 15        | 0.023085747                  | 0.023085747                 | -0.9                | 15        | 0.025996534                  | 0                           |
| -0.8       | 19     | 0.029968454         | 19        | 0.029968454                  | 0.029968454                 | -0.8                | 15        | 0.025996534                  | 0                           |
| -0.7       | 25     | 0.039432177         | 25        | 0.039432177                  | 0.039432177                 | -0.7                | 16        | 0.027729636                  | 0                           |
| -0.6       | 19     | 0.029968454         | 19        | 0.029968454                  | 0.029968454                 | -0.6                | 22        | 0.0312825                    | 0                           |
| -0.5       | 23     | 0.036277603         | 23        | 0.036277603                  | 0.036277603                 | -0.5                | 20        | 0.034662045                  | 0                           |
| -0.4       | 15     | 0.023659306         | 15        | 0.023659306                  | 0.023659306                 | -0.4                | 25        | 0.043327556                  | 0                           |
| -0.3       | 25     | 0.039432177         | 25        | 0.039432177                  | 0.039432177                 | -0.3                | 23        | 0.039661352                  | 0                           |
| -0.2       | 28     | 0.04164038          | 28        | 0.04164038                   | 0.04164038                  | -0.2                | 22        | 0.03812825                   | 0                           |
| -0.1       | 30     | 0.047318612         | 30        | 0.047318612                  | 0.047318612                 | -0.1                | 20        | 0.034662045                  | 0                           |
| 0          | 33     | 0.052050473         | 33        | 0.052050473                  | 0.052050473                 | 0                   | 36        | 0.062391681                  | 0                           |
| 0.1        | 52     | 0.049182679         | 52        | 0.049182679                  | 0.049182679                 | 0.1                 | 40        | 0.06932409                   | 0                           |
| 0.2        | 31     | 0.04895989          | 31        | 0.04895989                   | 0.04895989                  | 0.2                 | 13        | 0.022530329                  | 0                           |
| 0.3        | 43     | 0.067823344         | 43        | 0.067823344                  | 0.067823344                 | 0.3                 | 16        | 0.039231133                  | 0                           |
| 0.4        | 28     | 0.04164038          | 28        | 0.04164038                   | 0.04164038                  | 0.4                 | 16        | 0.027729636                  | 0                           |
| 0.5        | 28     | 0.04164038          | 28        | 0.04164038                   | 0.04164038                  | 0.5                 | 22        | 0.0312825                    | 0                           |
| 0.6        | 30     | 0.047318612         | 30        | 0.047318612                  | 0.047318612                 | 0.6                 | 23        | 0.039661352                  | 0                           |
| 0.7        | 18     | 0.028391167         | 18        | 0.028391167                  | 0.028391167                 | 0.7                 | 18        | 0.031195841                  | 0                           |
| 0.8        | 13     | 0.020504732         | 13        | 0.020504732                  | 0.020504732                 | 0.8                 | 22        | 0.03812825                   | 0                           |
| 0.9        | 11     | 0.017350158         | 11        | 0.017350158                  | 0.017350158                 | 0.9                 | 13        | 0.022530329                  | 0                           |
| 1          | 11     | 0.012618297         | 11        | 0.012618297                  | 0.012618297                 | 1                   | 18        | 0.031195841                  | 0                           |
| 1.1        | 8      | 0.018927445         | 8         | 0.018927445                  | 0.018927445                 | 1.1                 | 8         | 0.02190011                   | 0                           |
| 1.2        | 12     | 0.014052194         | 12        | 0.014052194                  | 0.014052194                 | 1.2                 | 12        | 0.012137116                  | 0                           |
| 1.3        | 5      | 0.007866435         | 5         | 0.007866435                  | 0.007866435                 | 1.3                 | 12        | 0.02078727                   | 0                           |
| 1.4        | 4      | 0.006309148         | 4         | 0.006309148                  | 0.006309148                 | 1.4                 | 11        | 0.019064125                  | 0                           |
| 1.5        | 4      | 0.006309148         | 4         | 0.006309148                  | 0.006309148                 | 1.5                 | 5         | 0.00665511                   | 0                           |
| 1.6        | 5      | 0.007866435         | 5         | 0.007866435                  | 0.007866435                 | 1.6                 | 2         | 0.003466205                  | 0                           |
| 1.7        | 7      | 0.011041009         | 7         | 0.011041009                  | 0.011041009                 | 1.7                 | 8         | 0.013864818                  | 0                           |
| 1.8        | 5      | 0.007866435         | 5         | 0.007866435                  | 0.007866435                 | 1.8                 | 3         | 0.003466205                  | 0                           |
| 1.9        | 3      | 0.004731861         | 3         | 0.004731861                  | 0.004731861                 | 1.9                 | 3         | 0.005199307                  | 0                           |
| 2          | 2      | 0.003154574         | 2         | 0.003154574                  | 0.003154574                 | 2                   | 3         | 0.005199307                  | 0                           |

|               |   |              |     |             |             |     |             |             |
|---------------|---|--------------|-----|-------------|-------------|-----|-------------|-------------|
| -1.397275657  | 1 | 0.527027027  | 1   | 0.001577287 | 0.004166302 | 1   | 0.001733102 | 0.00398869  |
| -1.39723387   | 1 | 0.530201342  | 2.1 | 0.003164574 | 0.003584743 | 2.1 | 0.003466205 | 0.003781314 |
| -1.395611196  | 0 | 0.522666667  | 2.2 | 0.001577287 | 0.002581015 | 2.2 | 0.001733102 | 0.00299354  |
| -1.386228463  | 1 | 0.5229801325 | 2.3 | 0.003164574 | 0.002150846 | 2.3 | 0.005199307 | 0.002678431 |
| -1.386375935  | 0 | 0.5229801325 | 2.4 | 0           | 0.001720677 | 2.4 | 0           | 0.002363321 |
| -1.384002214  | 0 | 0.5229801325 | 2.5 | 0           | 0.001577287 | 2.5 | 0           | 0.002048212 |
| -1.3811905299 | 0 | 0.536423841  | 2.6 | 0.001577287 | 0.001433897 | 2.6 | 0.001733102 | 0.00205767  |
| -1.363340786  | 0 | 0.536423841  | 2.7 | 0.001577287 | 0.001147118 | 2.7 | 0.005199307 | 0.001890657 |
| -1.354232947  | 0 | 0.529801325  | 2.8 | 0           | 0.001003728 | 2.8 | 0           | 0.001733102 |
| -1.340514444  | 0 | 0.523178808  | 2.9 | 0.003164574 | 0.000716949 | 2.9 | 0.001733102 | 0.001260438 |
| -1.340007792  | 0 | 0.516556291  | 3.1 | 0.001577287 | 0.000860338 | 3.1 | 0.001733102 | 0.001260438 |
| -1.333380102  | 0 | 0.509933775  | 3.2 | 0           | 0.000716949 | 3.2 | 0.003466205 | 0.001260438 |
| -1.333262642  | 1 | 0.509933775  | 3.3 | 0           | 0.000573559 | 3.3 | 0           | 0.001260438 |
| -1.321296478  | 0 | 0.503311258  | 3.4 | 0           | 0.000573559 | 3.4 | 0           | 0.000787774 |
| -1.31726302   | 0 | 0.496688742  | 3.5 | 0           | 0.000573559 | 3.5 | 0           | 0.000945329 |
| -1.315643969  | 0 | 0.496688742  | 3.6 | 0           | 0.00286779  | 3.6 | 0           | 0.000787774 |
| -1.3127503601 | 1 | 0.496688742  | 3.7 | 0.001577287 | 0.000286779 | 3.7 | 0           | 0.000787774 |
| -1.27503601   | 1 | 0.516556291  | 3.8 | 0           | 0.00014339  | 3.8 | 0.001733102 | 0.00031511  |
| -1.258134974  | 1 | 0.516556291  | 3.9 | 0           | 0.00014339  | 3.9 | 0           | 0.000472664 |
| -1.250632612  | 0 | 0.523178808  | 4   | 0           | 0.00014339  | 4   | 0.001733102 | 0.000945329 |
| -1.244434885  | 0 | 0.529801325  | 4   | 0           | 0.00014339  | 4   | 0           | 0.000472664 |
| -1.232780044  | 1 | 0.496688742  | 4   | 0           | 0.00014339  | 4   | 0           | 0.001102883 |
| -1.22261672   | 1 | 0.536423841  | 4   | 0           | 0           | 4   | 0           | 0.001102883 |
| -1.22261672   | 1 | 0.536423841  | 4   | 0           | 0           | 4   | 0           | 0.001102883 |
| -1.218366277  | 0 | 0.536423841  | 4.1 | 0           | 0           | 4.1 | 0           | 0.001102883 |
| -1.216881612  | 0 | 0.536423841  | 4.2 | 0           | 0           | 4.2 | 0           | 0.001102883 |
| -1.216881612  | 0 | 0.536423841  | 4.3 | 0           | 0           | 4.3 | 0           | 0.001102883 |
| -1.213622595  | 0 | 0.536423841  | 4.4 | 0           | 0           | 4.4 | 0           | 0.000945329 |
| -1.209460306  | 0 | 0.536423841  | 4.4 | 0           | 0           | 4.4 | 1           | 0.000945329 |
| -1.206341746  | 0 | 0.5229801325 | 4.5 | 0           | 0           | 4.5 | 3           | 0.000945329 |
| -1.196126903  | 0 | 0.523178808  | 4.6 | 0           | 0           | 4.6 | 1           | 0.00066551  |
| -1.192412897  | 0 | 0.523178808  | 4.7 | 0           | 0           | 4.7 | 0           | 0.00066551  |
| -1.177194033  | 1 | 0.516556291  | 4.8 | 0           | 0           | 4.8 | 0           | 0.001083189 |
| -1.175068699  | 1 | 0.509933775  | 4.9 | 0           | 0           | 4.9 | 0           | 0.00123793  |
| -1.173583973  | 0 | 0.509933775  | 5   | 0           | 0           | 5   | 0           | 0.001155402 |
| -1.168954114  | 0 | 0.503311258  | 0   | 0           | 0           | 0   | 0           |             |
| -1.154299111  | 0 | 0.509933775  | 0   | 0           | 0           | 0   | 0           |             |
| -1.154179594  | 0 | 0.516556291  | 0   | 0           | 0           | 0   | 0           |             |
| -1.152989461  | 0 | 0.509933775  | 0   | 0           | 0           | 0   | 0           |             |
| -1.152836994  | 0 | 0.509933775  | 0   | 0           | 0           | 0   | 0           |             |
| -1.151539568  | 0 | 0.503311258  | 0   | 0           | 0           | 0   | 0           |             |
| -1.141414768  | 0 | 0.496688742  | 0   | 0           | 0           | 0   | 0           |             |
| -1.133062116  | 0 | 0.496688742  | 0   | 0           | 0           | 0   | 0           |             |
| -1.116842236  | 0 | 0.490066225  | 0   | 0           | 0           | 0   | 0           |             |
| -1.10328597   | 0 | 0.496688742  | 0   | 0           | 0           | 0   | 0           |             |
| -1.101811342  | 0 | 0.490066225  | 0   | 0           | 0           | 0   | 0           |             |
| -1.099826797  | 1 | 0.496688742  | 0   | 0           | 0           | 0   | 0           |             |
| -1.092496659  | 1 | 0.490066225  | 0   | 0           | 0           | 0   | 0           |             |
| -1.091959119  | 1 | 0.490066225  | 0   | 0           | 0           | 0   | 0           |             |
| -1.080264625  | 1 | 0.490066225  | 0   | 0           | 0           | 0   | 0           |             |
| -1.077259728  | 1 | 0.483443709  | 0   | 0           | 0           | 0   | 0           |             |
| -1.063143094  | 0 | 0.490066225  | 0   | 0           | 0           | 0   | 0           |             |
| -1.061946011  | 0 | 0.490066225  | 0   | 0           | 0           | 0   | 0           |             |
| -1.055849304  | 0 | 0.490066225  | 0   | 0           | 0           | 0   | 0           |             |
| -1.051686529  | 0 | 0.496688742  | 0   | 0           | 0           | 0   | 0           |             |
| -1.050283559  | 0 | 0.490066225  | 0   | 0           | 0           | 0   | 0           |             |
| -1.049380744  | 1 | 0.490066225  | 0   | 0           | 0           | 0   | 0           |             |
| -1.044455719  | 0 | 0.483443709  | 0   | 0           | 0           | 0   | 0           |             |
| -1.041263763  | 0 | 0.476821192  | 0   | 0           | 0           | 0   | 0           |             |
| -1.03898016   | 0 | 0.476821192  | 0   | 0           | 0           | 0   | 0           |             |
| -1.028289371  | 0 | 0.476821192  | 0   | 0           | 0           | 0   | 0           |             |
| -1.016574267  | 0 | 0.483443709  | 0   | 0           | 0           | 0   | 0           |             |
| -1.013713426  | 0 | 0.483443709  | 0   | 0           | 0           | 0   | 0           |             |
| -1.013642698  | 1 | 0.483443709  | 0   | 0           | 0           | 0   | 0           |             |
| -1.009220541  | 0 | 0.476821192  | 0   | 0           | 0           | 0   | 0           |             |
| -1.009019533  | 1 | 0.476821192  | 0   | 0           | 0           | 0   | 0           |             |





-0.584094905  
-0.581343277  
-0.5779679275  
-0.575391572  
-0.570397276  
-0.570397276  
-0.570397276  
-0.570397276  
-0.570256096  
-0.567170825  
-0.558368768  
-0.556766604  
-0.553072037  
-0.548756063  
-0.5444857413  
-0.5410637  
-0.538195392  
-0.531639088  
-0.526378971  
-0.526378971  
-0.522544168  
-0.518649198  
-0.518002042  
-0.511779332  
-0.508493627  
-0.508480145  
-0.508370501  
-0.507768096  
-0.504328956  
-0.503905151  
-0.502872643  
-0.502872643  
-0.502872643  
-0.501463488  
-0.494534073  
-0.494534073  
-0.494350666  
-0.491156564  
-0.490043469  
-0.488541016  
-0.48138788  
-0.480274833  
-0.478117314  
-0.476946666  
-0.476293237  
-0.475556667  
-0.467101604  
-0.46640962  
-0.462189462  
-0.455597931  
-0.453337363  
-0.452337965  
-0.451876681  
-0.450131832  
-0.448937025  
-0.44755007  
-0.443195751  
-0.44187329  
-0.441480137  
-0.435878366  
-0.435739865  
-0.432615497  
-0.431466623  
-0.429909354  
-0.428447318  
-0.426987805  
-0.426779759  
-0.425548083  
-0.42088855  
-0.420643252  
-0.417603913  
-0.414800277  
-0.410401982  
-0.406784284  
-0.396928279  
-0.396032401

0

0

0

1

1

0

0

1

1

0

0

1

1

0

0

1

1

0

0

1

1

0

0

1

1

0

0

1

1

0

0

1

1

0

0

1

1

0

0

1

1

0

0

1

1

0

0

1

1

0

0

1

1

0

0

1

1

0

0

1

1

0

0

1

1

0

0

1

1

0

0

1

1

0

0

1

1

0

0

1

1

0

0

1

1

0

0

1

1

0

0

1

1

0

0

1

1

0

0

1

1

0

0

1

1

0

0

1

1

0

0

1

1

0

0

1

1

0

0

1

1

0

0

1

1

0

0

1

1

0

0

1

1

0

0

1

1

0

0

1

1

0

0

1

1

0

0

1

1

0

0

1

1

0

0

1

1

0

0

1

1

0

0

1

1

0

0

1

1

0

0

1

1

0

0

1

1

0

0

1

1

0

0

1

1

0

0

1

1

0

0

1

1

0

0

1

1

0

0

1

1

0

0

1

1

0

0

1

1

0

0

1

1

0

0

1

1

0

0

1

1

0

0

1

1

0

0

1

1

0

0

1

1

0

0

1

1

0

0

1

1

0

0

1

1

0

0

1

1

0

0

1

1

0

0

1

1

0

0

1

1

0

0

1

1

0

0

1

1

0

0

1

1

0

0

1

1

0

0

1

1

0

0

1

1

0

0

1

1

0

0

1

1

0

0

1

1

0

0

1

1

0

0

1

1

0

0

1

1

0

0

1

1

0

0

1

1

0

0

1

1

0

0

1

1

0

0

1

1

0

0

1



-0.235618086 0 0.42384108  
-0.229199497 0 0.417218543  
-0.229157756 1 0.410596026  
-0.225051633 1 0.40397351  
-0.225051633 0 0.410596026  
-0.224962327 1 0.410596026  
-0.223851119 0 0.410596026  
-0.222411208 0 0.417218543  
-0.220676968 1 0.410596026  
-0.216774498 1 0.417218543  
-0.215283631 1 0.410596026  
-0.215283631 1 0.40397351  
-0.21338988 0 0.397350993  
-0.212103704 0 0.397350993  
-0.2094255 1 0.40397351  
-0.208843647 0 0.410596026  
-0.208281475 0 0.417218543  
-0.208281475 0 0.417218543  
-0.198575995 1 0.42384108  
-0.196462896 1 0.430463576  
-0.183870987 1 0.430463576  
-0.18229786 1 0.430463576  
-0.181948593 0 0.437086093  
-0.181614423 0 0.437086093  
-0.181008599 0 0.437086093  
-0.1792977 0 0.437086093  
-0.178409327 0 0.4437708609  
-0.178294653 0 0.4437708609  
-0.177185385 1 0.450331126  
-0.177184359 1 0.450331126  
-0.176439254 0 0.463576159  
-0.17376856 0 0.463576159  
-0.170707376 1 0.456953642  
-0.169064895 0 0.456953642  
-0.167490115 0 0.456953642  
-0.166732348 1 0.456953642  
-0.161289059 1 0.456953642  
-0.16013442 1 0.450331126  
-0.159872105 0 0.4437708609  
-0.158430022 0 0.4437708609  
-0.157969328 0 0.450331126  
-0.156296478 1 0.450331126  
-0.15616477 0 0.4437708609  
-0.15475339 0 0.4437708609  
-0.153293422 1 0.437086093  
-0.153293422 1 0.4437708609  
-0.153293422 1 0.4437708609  
-0.153293422 1 0.4437708609  
-0.149170119 0 0.450331126  
-0.144593677 1 0.456953642  
-0.140319864 0 0.456953642  
-0.140227307 0 0.456953642  
-0.136733165 1 0.463576159  
-0.134380484 1 0.456953642  
-0.132365264 0 0.456953642  
-0.132132518 0 0.463576159  
-0.129516631 1 0.463576159  
-0.126246147 0 0.463576159  
-0.122567495 0 0.463576159  
-0.122245736 1 0.470198675  
-0.122227591 0 0.463576159  
-0.120621657 0 0.470198675  
-0.119243992 0 0.4776821192  
-0.113442311 0 0.483443709  
-0.106536072 0 0.490066225  
-0.100912266 0 0.490066225  
-0.100912266 0 0.483443709  
-0.099835337 0 0.490066225  
-0.098418874 0 0.490066225  
-0.096653624 0 0.483443709  
-0.096438837 0 0.483443709  
-0.095655362 0 0.483443709  
-0.095214246 1 0.4776821192  
-0.093082718 1 0.4776821192  
-0.092076809 0 0.483443709

-0.082265615 0 0 0.4900066225  
-0.080601666 1 0 0.4900066225  
-0.079869008 0 0 0.4900066225  
-0.079736974 1 0 0.4900066225  
-0.079736974 1 0 0.4900066225  
-0.079736974 1 0 0.4900066225  
-0.075661847 0 0 0.5033311258  
-0.074684185 1 0 0.496688742  
-0.074684185 1 0 0.496688742  
-0.074684185 1 0 0.4900066225  
-0.074684185 1 0 0.483443709  
-0.074110178 0 0 0.476821192  
-0.072999748 0 0 0.476821192  
-0.070879045 1 0 0.470198675  
-0.067116959 1 0 0.470198675  
-0.066905907 1 0 0.470198675  
-0.064593683 0 0 0.476821192  
-0.062451196 1 0 0.476821192  
-0.060934437 1 0 0.470198675  
-0.060135636 0 0 0.470198675  
-0.059901712 1 0 0.470198675  
-0.05838262 1 0 0.463576159  
-0.057905838 0 0 0.463576159  
-0.056185296 0 0 0.470198675  
-0.053081651 1 0 0.476821192  
-0.053081651 1 0 0.476821192  
-0.053081651 1 0 0.476821192  
-0.046718445 1 0 0.483443709  
-0.045968479 1 0 0.476821192  
-0.045571467 0 0 0.470198675  
-0.045442052 0 0 0.470198675  
-0.044627994 0 0 0.470198675  
-0.044615203 1 0 0.470198675  
-0.041731533 1 0 0.476821192  
-0.041731533 1 0 0.476821192  
-0.041369887 1 0 0.470198675  
-0.041369887 1 0 0.470198675  
-0.038738538 0 0 0.463576159  
-0.038689059 0 0 0.456963642  
-0.0386623798 1 0 0.456963642  
-0.03595222 1 0 0.456963642  
-0.035172652 1 0 0.456963642  
-0.034678733 0 0 0.450331126  
-0.034520487 0 0 0.456963642  
-0.033613373 0 0 0.456963642  
-0.032612557 1 0 0.463576159  
-0.032197486 1 0 0.456963642  
-0.031775248 1 0 0.456963642  
-0.028875048 1 0 0.443708609  
-0.026224833 1 0 0.450331126  
-0.026224833 1 0 0.450331126  
-0.025555915 0 0 0.456963642  
-0.023813585 1 0 0.463576159  
-0.023813585 1 0 0.456963642  
-0.023813585 1 0 0.456963642  
-0.018452204 0 0 0.456963642  
-0.017159534 1 0 0.463576159  
-0.016837114 0 0 0.470198675  
-0.016357328 1 0 0.470198675  
-0.01401864 1 0 0.470198675  
-0.0114109 1 0 0.470198675  
-0.006125815 0 0 0.470198675  
0 0 0 0.470198675  
0 0 0 0.470198675  
0 0 0 0.470198675  
0 0 0 0.470198675  
0 0 0 0.470198675  
0 0 0 0.470198675  
0 0 0 0.476821192  
0 0 0 0.483443709  
0 0 0 0.4900066225  
0 0 0 0.4900066225  
0 0 0 0.483443709  
0 0 0 0.476821192  
0 0 0 0.483443709  
0 0 0 0.483443709  
0 0 0 0.4900066225



0 0.006125815 0.483443709 1  
0 0.009135107 0.490066225 1  
0 0.010760968 0.483443709 1  
0 0.011749285 0.4776821192 1  
0 0.013827992 0.4776821192 1  
0 0.014018664 0.4776821192 1  
0 0.014961054 0.4776821192 1  
0 0.015756351 0.483443709 1  
0 0.016837114 0.483443709 1  
0 0.018174717 0.483443709 1  
0 0.019216074 0.4776821192 1  
0 0.021373504 0.4776821192 1  
0 0.024230269 0.4776821192 1  
0 0.0255553915 0.4776821192 1  
0 0.02562191 0.4776821192 1  
0 0.033613373 0.4776821192 1  
0 0.034520487 0.4776821192 1  
0 0.035172652 0.4776821192 1  
0 0.035291725 0.4776821192 1  
0 0.036080169 0.4776821192 1  
0 0.036890059 0.4776821192 1  
0 0.037506364 0.4776821192 1  
0 0.037506364 0.4776821192 1  
0 0.038738538 0.4776821192 1  
0 0.03942315 0.4776821192 1  
0 0.042922834 0.4776821192 1  
0 0.043545032 0.4776821192 1  
0 0.045664088 0.4776821192 1  
0 0.046173901 0.4776821192 1  
0 0.047387443 0.4776821192 1  
0 0.047509724 0.4776821192 1  
0 0.048312767 0.4776821192 1  
0 0.050667997 0.4776821192 1  
0 0.051401792 0.4776821192 1  
0 0.052485518 0.4776821192 1  
0 0.053724218 0.4776821192 1  
0 0.056747657 0.4776821192 1  
0 0.060135636 0.4776821192 1  
0 0.062417724 0.4776821192 1  
0 0.062417724 0.4776821192 1  
0 0.062442111 0.4776821192 1  
0 0.062442111 0.4776821192 1  
0 0.062552602 0.4776821192 1  
0 0.068074269 0.4776821192 1  
0 0.071358574 0.4776821192 1  
0 0.072345561 0.4776821192 1  
0 0.075163576 0.4776821192 1  
0 0.079311161 0.4776821192 1  
0 0.079935452 0.4776821192 1  
0 0.080483932 0.4776821192 1  
0 0.081441179 0.4776821192 1  
0 0.084429679 0.4776821192 1  
0 0.085915144 0.4776821192 1  
0 0.086423854 0.4776821192 1  
0 0.086498792 0.4776821192 1  
0 0.088257879 0.4776821192 1  
0 0.090121524 0.4776821192 1  
0 0.091182442 0.4776821192 1  
0 0.09146691 0.4776821192 1  
0 0.091676045 0.4776821192 1  
0 0.092408605 0.4776821192 1  
0 0.09284265 0.4776821192 1  
0 0.094692083 0.4776821192 1  
0 0.099101502 0.4776821192 1  
0 0.099132328 0.4776821192 1  
0 0.101382844 0.4776821192 1

0.101382844 0 0 0.3224503311  
0.102281645 0 0 0.3224503311  
0.105161594 0 0 0.317880795  
0.108739806 0 0 0.311258278  
0.111585048 1 1 0.311258278  
0.111585048 1 1 0.311258278  
0.111585048 1 1 0.311258278  
0.111585048 1 1 0.317880795  
0.111585048 1 1 0.317880795  
0.112082068 0 0 0.317880795  
0.112751682 1 1 0.311258278  
0.116662423 0 0 0.304635762  
0.12150728 0 0 0.304635762  
0.121832147 0 0 0.304635762  
0.122586437 0 0 0.304635762  
0.127523954 0 0 0.304635762  
0.127523954 0 0 0.304635762  
0.130590263 0 0 0.311258278  
0.134063226 1 1 0.311258278  
0.1344489706 0 0 0.311258278  
0.136189543 0 0 0.304635762  
0.13680559 1 1 0.311258278  
0.138469381 0 0 0.311258278  
0.139959556 0 0 0.317880795  
0.151940416 0 0 0.311258278  
0.1544498889 1 1 0.311258278  
0.1544498889 1 1 0.311258278  
0.156363133 0 0 0.331125828  
0.164872654 1 1 0.331125828  
0.164872654 1 1 0.3224503311  
0.16515522 0 0 0.3224503311  
0.165688066 0 0 0.3224503311  
0.176683282 1 1 0.331125828  
0.177032383 1 1 0.331125828  
0.176220054 0 0 0.331125828  
0.178995003 0 0 0.331125828  
0.180398872 0 0 0.337748344  
0.18221564 0 0 0.337748344  
0.189163977 0 0 0.331125828  
0.190638627 0 0 0.331125828  
0.190638627 0 0 0.3224503311  
0.194733948 0 0 0.317880795  
0.203533924 0 0 0.3224503311  
0.204232764 0 0 0.331125828  
0.204464602 0 0 0.331125828  
0.205708797 0 0 0.331125828  
0.213157118 0 0 0.331125828  
0.214233342 1 1 0.3224503311  
0.214233342 0 0 0.331125828  
0.214233342 0 0 0.331125828  
0.214233342 0 0 0.3224503311  
0.216436225 1 1 0.3224503311  
0.217572023 0 0 0.317880795  
0.22327647 1 1 0.317880795  
0.223636729 0 0 0.317880795  
0.223636729 0 0 0.317880795  
0.223636729 0 0 0.317880795  
0.223703726 0 0 0.3224503311  
0.2247055893 1 1 0.3224503311  
0.225298884 0 0 0.3224503311  
0.227774915 1 1 0.331125828  
0.23039143 0 0 0.331125828  
0.230842406 0 0 0.331125828  
0.2317069935 0 0 0.337748344  
0.232725071 0 0 0.337748344  
0.23606975 0 0 0.337748344  
0.238750543 0 0 0.331125828  
0.239514769 1 1 0.331125828  
0.240138709 0 0 0.331125828  
0.240138709 0 0 0.331125828  
0.240138709 0 0 0.337748344  
0.241598019 1 1 0.337748344  
0.24213335 0 0 0.331125828  
0.244155472 0 0 0.331125828  
0.244698583 0 0 0.331125828  
0.2469753 0 0 0.331125828

0.251912924 0 0.331125828  
0.252932434 0 0.331125828  
0.2538661 0 0.331125828  
0.25577821 0 0.3224503311  
0.257138287 0 0.3224503311  
0.258967399 0 0.3117880795  
0.263510905 1 0.3224503311  
0.263969858 0 0.331125828  
0.264209727 0 0.331125828  
0.26549637 0 0.3224503311  
0.266257369 0 0.3224503311  
0.266331654 0 0.3224503311  
0.266684964 0 0.331125828  
0.271094807 1 0.331125828  
0.272380433 1 0.337748344  
0.273883453 1 0.337748344  
0.275581239 0 0.344370861  
0.28166271 1 0.337748344  
0.28166271 1 0.337748344  
0.284062372 1 0.344370861  
0.287450752 1 0.344370861  
0.289721877 1 0.344370861  
0.289721877 1 0.344370861  
0.297599121 1 0.3509893377  
0.301745574 1 0.344370861  
0.305759524 1 0.337748344  
0.306826412 1 0.337748344  
0.308054193 0 0.337748344  
0.308231952 0 0.344370861  
0.308665081 0 0.344370861  
0.310884219 0 0.344370861  
0.310892078 1 0.344370861  
0.310892078 1 0.337748344  
0.310892078 1 0.337748344  
0.31352179 1 0.337748344  
0.316507821 0 0.337748344  
0.321764934 0 0.337748344  
0.3249223909 0 0.344370861  
0.3249223909 0 0.344370861  
0.325120634 0 0.344370861  
0.327844467 1 0.344370861  
0.331638803 1 0.3509893377  
0.332885852 1 0.357615894  
0.332964738 1 0.357615894  
0.3335074 1 0.357615894  
0.336798919 1 0.364238411  
0.339677087 1 0.357615894  
0.341673546 0 0.364238411  
0.342935043 0 0.364238411  
0.347691375 1 0.370860927  
0.348704454 0 0.370860927  
0.350636345 1 0.370860927  
0.351340422 1 0.364238411  
0.351789771 0 0.364238411  
0.352327209 0 0.370860927  
0.353717801 1 0.377483444  
0.355192395 0 0.377483444  
0.356154329 0 0.38410596  
0.356845817 0 0.377483444  
0.359492092 1 0.377483444  
0.369994374 1 0.377483444  
0.371290815 1 0.38410596  
0.376445543 0 0.38410596  
0.376717377 1 0.390728477  
0.37721353 1 0.397350993  
0.37721353 0 0.397350993  
0.38141461 0 0.397350993  
0.38141461 0 0.397350993  
0.382435822 1 0.40397351  
0.388722011 1 0.40397351  
0.389712788 1 0.40397351  
0.397410186 1 0.410596026  
0.399242702 0 0.410596026  
0.40292688 0 0.417218543  
0.403788504 0 0.417218543

0.407067849 0 0.417218543  
0.410483679 0 0.417218543  
0.411179787 1 0.42384106  
0.411565065 0 0.42384106  
0.415803357 1 0.42384106  
0.417085367 1 0.417218543  
0.420779472 1 0.417218543  
0.420800869 0 0.42384106  
0.421388218 0 0.42384106  
0.425248471 0 0.42384106  
0.425667647 0 0.430463576  
0.428061221 0 0.430463576  
0.436999805 1 0.430463576  
0.437654582 1 0.42384106  
0.438937063 1 0.42384106  
0.440197399 1 0.417218543  
0.445808316 0 0.417218543  
0.447819001 0 0.417218543  
0.448326087 1 0.417218543  
0.449459663 1 0.42384106  
0.452852969 0 0.42384106  
0.460498732 0 0.430463576  
0.462112033 1 0.42384106  
0.463029373 0 0.417218543  
0.464159195 0 0.410596026  
0.465377391 0 0.417218543  
0.467140125 1 0.417218543  
0.468441481 1 0.417218543  
0.469149075 0 0.417218543  
0.469819099 0 0.42384106  
0.473072921 1 0.42384106  
0.473072921 0 0.430463576  
0.475610489 0 0.430463576  
0.478727637 0 0.437086093  
0.478727637 0 0.443708609  
0.478727637 0 0.443708609  
0.485796215 1 0.443708609  
0.489153584 0 0.450331126  
0.490361139 0 0.456953642  
0.490439254 0 0.456953642  
0.491286616 1 0.450331126  
0.491823192 1 0.443708609  
0.508873973 0 0.437086093  
0.509480465 0 0.437086093  
0.509876945 1 0.437086093  
0.510313834 0 0.430463576  
0.516706187 1 0.430463576  
0.517567008 0 0.437086093  
0.518158555 1 0.430463576  
0.518535751 1 0.430463576  
0.518619133 0 0.42384106  
0.519778633 0 0.417218543  
0.519778633 0 0.430463576  
0.520495558 1 0.42384106  
0.520540293 1 0.42384106  
0.521101946 0 0.42384106  
0.522391525 1 0.430463576  
0.523321992 1 0.437086093  
0.524651672 1 0.443708609  
0.524753093 0 0.443708609  
0.52566039 1 0.437086093  
0.52566039 0 0.443708609  
0.52948243 1 0.443708609  
0.536099485 1 0.443708609  
0.537378981 0 0.437086093  
0.537911716 0 0.443708609  
0.545117673 1 0.450331126  
0.549159597 1 0.443708609  
0.549159597 1 0.443708609  
0.550215835 1 0.450331126  
0.551237198 1 0.450331126  
0.552252127 1 0.456953642  
0.557753907 1 0.456953642  
0.558260192 0 0.456953642  
0.558260192 0 0.463576159  
0.561633675 0 0.463576159

0.563568753 1 0.470198675  
0.56414181 1 0.470198675  
0.56445339 0 0.470198675  
0.571813863 0 0.470198675  
0.574879565 0 0.470198675  
0.575474411 1 0.470198675  
0.575474411 0 0.476821192  
0.582240465 0 0.476821192  
0.582866563 1 0.476821192  
0.583472142 0 0.476821192  
0.583472142 1 0.476821192  
0.586001739 1 0.483443709  
0.587085333 0 0.483443709  
0.589443472 0 0.483443709  
0.58989754 0 0.483443709  
0.589908022 1 0.483443709  
0.597909607 0 0.483443709  
0.599175127 1 0.483443709  
0.600927823 1 0.476821192  
0.603678698 1 0.483443709  
0.605025183 1 0.483443709  
0.605421505 0 0.483443709  
0.605640907 0 0.490006625  
0.605897256 0 0.496688742  
0.612143874 1 0.490006625  
0.612143874 1 0.483443709  
0.616037084 0 0.483443709  
0.616236531 0 0.490006625  
0.617381757 1 0.490006625  
0.617381757 1 0.496688742  
0.619437073 1 0.496688742  
0.620488213 1 0.503311258  
0.621254992 1 0.509933775  
0.623811856 1 0.509933775  
0.631561231 0 0.516556291  
0.634747051 0 0.509933775  
0.636959931 1 0.509933775  
0.638641036 1 0.516556291  
0.650852147 1 0.516556291  
0.654501615 1 0.516556291  
0.65617324 0 0.509933775  
0.659598813 0 0.509933775  
0.661960785 0 0.509933775  
0.662849509 1 0.516556291  
0.669578239 0 0.523178808  
0.673548838 0 0.523178808  
0.680595992 1 0.516556291  
0.680975484 0 0.516556291  
0.688185031 0 0.509933775  
0.688185031 0 0.516556291  
0.692907802 0 0.523178808  
0.69405594 1 0.523178808  
0.698383304 1 0.523178808  
0.701587504 1 0.516556291  
0.702654638 1 0.523178808  
0.703493689 1 0.529801325  
0.704704865 0 0.536442384  
0.705758558 0 0.536442384  
0.707393039 1 0.529801325  
0.70793003 1 0.536442384  
0.716178748 1 0.536442384  
0.716644664 0 0.536442384  
0.718571466 1 0.536442384  
0.722543351 1 0.536442384  
0.722543351 0 0.536442384  
0.723519972 1 0.536442384  
0.725934592 1 0.543046358  
0.728220554 1 0.536442384  
0.73288445 0 0.523178808  
0.741588082 1 0.523178808  
0.746290465 0 0.516556291  
0.748788169 0 0.523178808  
0.751238811 0 0.529801325  
0.752144518 1 0.529801325  
0.753993653 1 0.529801325

0.758283347 0 0.529801325  
0.758743338 1 0.536423841  
0.765235475 1 0.543006358  
0.772177088 1 0.549668874  
0.783679108 0 0.549668874  
0.787451056 0 0.549668874  
0.789871123 0 0.549668874  
0.791121507 0 0.543006358  
0.795898603 0 0.549668874  
0.796071383 1 0.549668874  
0.798137208 1 0.543006358  
0.80621977 1 0.543006358  
0.806269337 0 0.543006358  
0.810062487 0 0.543006358  
0.814281902 0 0.549668874  
0.819663488 0 0.549668874  
0.82212511 1 0.543006358  
0.82212511 0 0.543006358  
0.823183295 1 0.536423841  
0.823279256 1 0.536423841  
0.824131879 0 0.543006358  
0.829247001 0 0.543006358  
0.829247001 0 0.536423841  
0.830195113 0 0.536423841  
0.836532518 0 0.543006358  
0.84959521 1 0.549668874  
0.852558908 1 0.543006358  
0.857841331 1 0.543006358  
0.86171823 1 0.543006358  
0.865898589 0 0.536423841  
0.866534047 0 0.536423841  
0.878881943 1 0.536423841  
0.885443945 0 0.536423841  
0.893009116 0 0.543006358  
0.894643574 1 0.543006358  
0.900306035 0 0.536423841  
0.904955443 0 0.529801325  
0.90766732 1 0.536423841  
0.913745753 0 0.543006358  
0.915126974 1 0.549668874  
0.915587343 1 0.556291391  
0.925077373 1 0.556291391  
0.926248787 0 0.562913907  
0.926444168 0 0.569536424  
0.927443286 0 0.569536424  
0.932621172 0 0.57615894  
0.9345164 1 0.582781457  
0.938000793 1 0.582781457  
0.938141521 0 0.582781457  
0.940994545 1 0.582781457  
0.943037779 0 0.589403974  
0.944487571 1 0.582781457  
0.958002386 1 0.582781457  
0.964237472 1 0.57615894  
0.965197139 1 0.582781457  
0.965881366 0 0.589403974  
0.969916695 0 0.582781457  
0.974980519 1 0.582781457  
0.984614444 1 0.582781457  
0.984664823 0 0.582781457  
0.98749472 0 0.57615894  
0.99455051 0 0.57615894  
0.995854593 1 0.582781457  
0.998179064 1 0.582781457  
1.000490204 0 0.57615894  
1.004279554 0 0.582781457  
1.01781375 0 0.569536424  
1.025013443 0 0.562913907  
1.029249524 0 0.569536424  
1.03775532 0 0.569536424  
1.043961833 1 0.569536424  
1.052082214 1 0.562913907  
1.052841108 0 0.562913907  
1.066681295 1 0.562913907  
1.070234726 0 0.569536424  
1.081447398 1 0.569536424

1 1.085941548 0.562913907  
1 1.094493531 0.556291391  
1 1.095262554 0.556291391  
1 1.097850785 0.556291391  
1 1.101437577 0.562913907  
0 1.130180752 0.569536424  
1 1.13545525 0.569536424  
1 1.13925127 0.562913907  
0 1.141922759 0.569536424  
0 1.143505396 0.562913907  
1 1.146698987 0.556291391  
1 1.147513962 0.549668874  
1 1.149411427 0.549668874  
1 1.154306118 0.549668874  
1 1.157511097 0.549668874  
0 1.175089151 0.549668874  
1 1.176636321 0.549668874  
1 1.176636321 0.549668874  
1 1.176636321 0.549668874  
1 1.178534315 0.549668874  
1 1.182518545 0.536423841  
0 1.19178591 0.5430046358  
1 1.198175974 0.5430046358  
1 1.200051092 0.5430046358  
1 1.202870802 0.549668874  
1 1.221518125 0.549668874  
1 1.225102113 0.549668874  
1 1.23301403 0.5430046358  
1 1.241501366 0.5430046358  
1 1.243456756 0.536423841  
1 1.24649213 0.5430046358  
1 1.249467102 0.5430046358  
1 1.260752289 0.5430046358  
1 1.269407709 0.549668874  
1 1.270638761 0.5430046358  
1 1.276132382 0.549668874  
1 1.28009868 0.549668874  
1 1.290656287 0.549668874  
1 1.297241269 0.556291391  
1 1.298478651 0.549668874  
1 1.302540238 0.549668874  
1 1.302540238 0.5430046358  
1 1.302540238 0.5430046358  
1 1.302862165 0.5430046358  
1 1.303643556 0.5430046358  
1 1.307528606 0.5430046358  
1 1.31234648 0.549668874  
1 1.339575779 0.549668874  
1 1.339925109 0.549668874  
1 1.356369248 0.549668874  
1 1.372953562 0.5430046358  
1 1.374978766 0.549668874  
1 1.37770959 0.549668874  
1 1.382533505 0.5430046358  
1 1.395911082 0.5430046358  
1 1.396947626 0.5430046358  
1 1.408881338 0.536423841  
1 1.417083033 0.5430046358  
1 1.423566559 0.5430046358  
1 1.434723736 0.5430046358  
1 1.447165347 0.5430046358  
1 1.454501324 0.549668874  
1 1.46442893 0.556291391  
1 1.472113195 0.556291391  
1 1.479656205 0.553333333  
1 1.508060677 0.55033557  
1 1.513777337 0.554054054  
1 1.523023847 0.557823129  
1 1.525199658 0.561643836  
1 1.534941089 0.565517241  
1 1.571597786 0.569444444  
1 1.594698593 0.566443566  
1 1.600784408 0.563380282  
1 1.609615491 0.567375887  
1 1.623114681 0.564285714  
1 1.624711379 0.568345324  
1 1.62543679 0.565217391  
0 1.628467938 0.562043796

1.640202788 1 0.558823529  
1.669403051 1 0.555555556  
1.674913837 1 0.559701493  
1.680199243 0 0.563909774  
1.682644787 1 0.568181818  
1.687246997 0 0.564885496  
1.688493932 1 0.569220769  
1.691984857 0 0.573643411  
1.697634325 0 0.576125  
1.726696111 0 0.582877165  
1.731874734 1 0.587301587  
1.732413663 1 0.584  
1.75030393 0 0.580645161  
1.75821359 0 0.577235772  
1.785527182 1 0.581967213  
1.799131271 0 0.577851297  
1.805264355 1 0.583333333  
1.822334514 0 0.5882235294  
1.83313335 1 0.584745763  
1.83833995 0 0.589743159  
1.845734546 0 0.594827586  
1.863681401 1 0.591304348  
1.90857161 1 0.587719298  
1.916321411 0 0.584070796  
1.934921394 1 0.5892285714  
1.94501492 1 0.581818182  
1.964048113 0 0.585858586  
2.050321665 0 0.587155963  
2.072770672 1 0.583333333  
2.10684124 1 0.579439252  
2.134930967 0 0.58490566  
2.165015789 1 0.580952381  
2.171124771 0 0.576923077  
2.207503343 1 0.582524272  
2.24719971 0 0.5882235294  
2.303808091 1 0.584158416  
2.334173316 1 0.58  
2.345858488 1 0.575757576  
2.378111291 0 0.571428571  
2.385749231 0 0.567010309  
2.560300343 0 0.5625  
2.639711233 1 0.557894737  
2.69695468 0 0.553191489  
2.705577694 1 0.548387097  
2.716544159 1 0.543478261  
2.728725986 1 0.54949450549  
2.855363156 0 0.555555556  
2.875556897 0 0.550561798  
2.901338751 1 0.54545454545  
3.06055264 1 0.5402229885  
3.07436239 0 0.546511628  
3.128949258 1 0.541176471  
3.142133415 1 0.547619048  
3.59202562 0 0.542168675  
3.73375267 1 0.536585366  
3.952352239 1 0.543209877  
4.334224319 1 0.5375  
4.406871039 1 0.53164557  
4.451060419 1 0.538461538  
4.470526758 1 0.545454545  
4.526787042 1 0.539473884
