# Supplementary material
Source: PubMed Central journal article supplement (PMC2783591)
Supplement: NIHMS147990-supplement-2.pdf [file NIHMS147990-supplement-2.pdf]

**Supplementary Figure 1.** Differences in Gene Ontological Terms, Transcript Expression Distribution, and spatial location in the cell between Spira et al, 2007 and Mullins et al, 2005 biomarker gene sets.

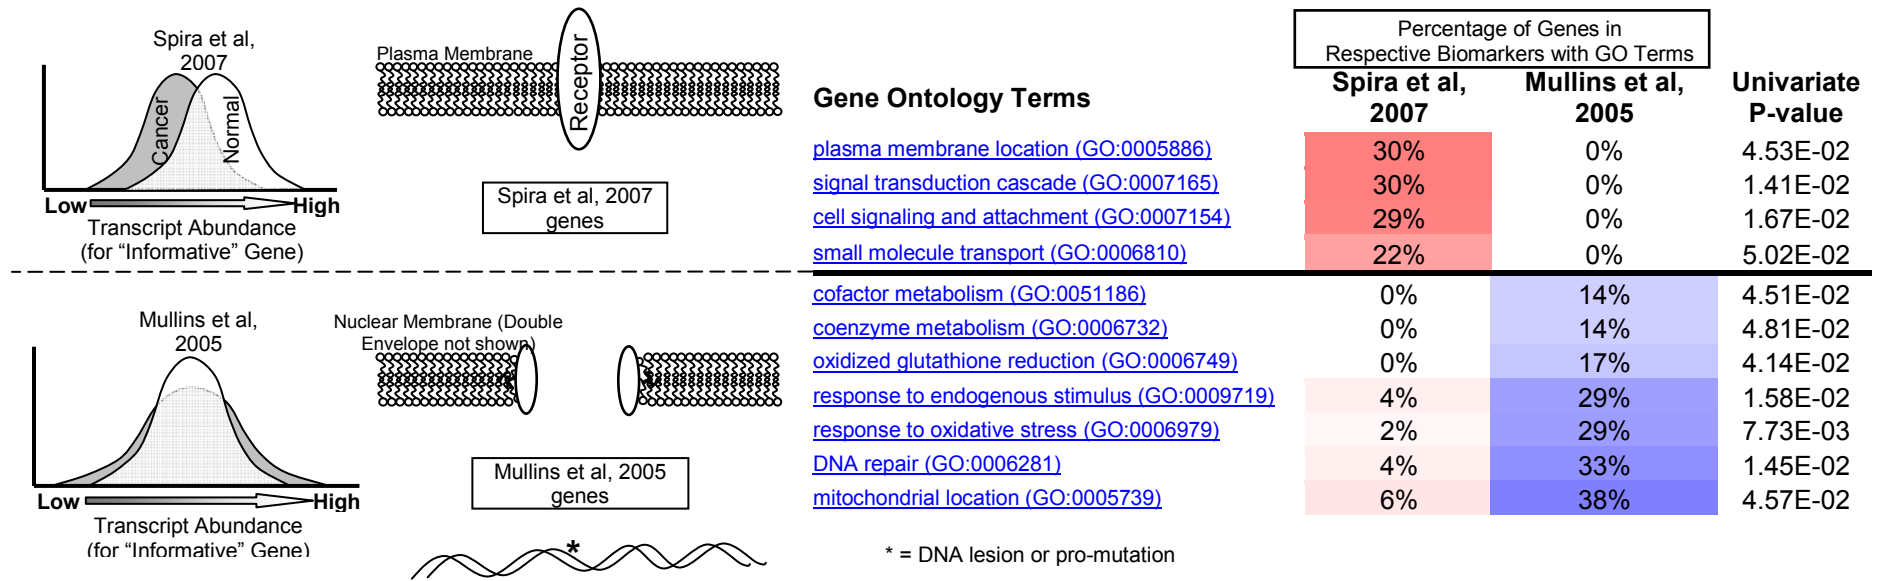

GO = Gene Ontology

**Transcript Expression Distribution:**

Shaded areas represent Cancer (for Spira study, cancer may be over-expressed or under-expressed relative to control group).  
White areas represent non-cancer group

**Univariate P-values represent significant differences in Chemical, Molecular, and cellular location gene category classifiers using web-based FatiGO tool.**

Al-Shahrour, F., Diaz-Uriarte, R., and Dopazo, J. FatiGO: a web tool for finding significant associations of Gene Ontology terms with groups of genes. Bioinformatics, 20: 578-580, 2004.

| <b>Gene Ontology Terms</b>                                   | <b>Spira et al,<br/>2007</b> | <b>Mullins et al,<br/>2005</b> | <b>Univariate<br/>P-value</b> |
|--------------------------------------------------------------|------------------------------|--------------------------------|-------------------------------|
| <a href="#">plasma membrane location (GO:0005886)</a>        | 30%                          | 0%                             | 4.53E-02                      |
| <a href="#">signal transduction cascade (GO:0007165)</a>     | 30%                          | 0%                             | 1.41E-02                      |
| <a href="#">cell signaling and attachment (GO:0007154)</a>   | 29%                          | 0%                             | 1.67E-02                      |
| <a href="#">small molecule transport (GO:0006810)</a>        | 22%                          | 0%                             | 5.02E-02                      |
| <a href="#">cofactor metabolism (GO:0051186)</a>             | 0%                           | 14%                            | 4.51E-02                      |
| <a href="#">coenzyme metabolism (GO:0006732)</a>             | 0%                           | 14%                            | 4.81E-02                      |
| <a href="#">oxidized glutathione reduction (GO:0006749)</a>  | 0%                           | 17%                            | 4.14E-02                      |
| <a href="#">response to endogenous stimulus (GO:0009719)</a> | 4%                           | 29%                            | 1.58E-02                      |
| <a href="#">response to oxidative stress (GO:0006979)</a>    | 2%                           | 29%                            | 7.73E-03                      |
| <a href="#">DNA repair (GO:0006281)</a>                      | 4%                           | 33%                            | 1.45E-02                      |
| <a href="#">mitochondrial location (GO:0005739)</a>          | 6%                           | 38%                            | 4.57E-02                      |
