# Supplementary material
Source: PubMed Central journal article supplement (PMC2783591)
Supplement: NIHMS147990-supplement-3.pdf [file NIHMS147990-supplement-3.pdf]

Case-Control Set 1

Mullins DN, Crawford EL, Khuder SA, Hernandez DA, Yoon Y, Willey JC. CEBPG transcription factor correlates with antioxidant and DNA repair genes in normal bronchial epithelial cells but not in individuals with bronchogenic carcinoma. BMC Cancer 2005; 5:141.

LC = Lung Cancer  
 NLC = non-Lung Cancer  
 ND = No data  
 \*\*\* Units are in Log base 10 transformed target transcript molecules per 10<sup>6</sup> ACTB transcript molecules

| SUBJECT# | Diagnosis | CAT  | CEBPG | E2F1 | ERCC4 | ERCC5 | GPX1 | GPX3 | GSTM3 | GSTP1 | GSTT1 | GSTZ1 | MGST1 | SOD1 | XRCC1 | Risk Test Value (RTV) | Age (Years:Gender) | Histology | Smoking Hx (Pack Years) | Race  |      |
|----------|-----------|------|-------|------|-------|-------|------|------|-------|-------|-------|-------|-------|------|-------|-----------------------|--------------------|-----------|-------------------------|-------|------|
| 34       | LC        | 4.83 | 4.23  | 2.76 | 3.18  | 5.08  | 5.94 | 3.49 | 2.71  | 6.26  | ND    | 3.28  | 4.79  | 5.46 | 4.75  | 7                     | 80                 | M         | NSCLC                   | 40    | W    |
| 71       | LC        | 4.98 | 4.08  | 3.11 | 2.38  | 5.34  | 5.94 | 4.11 | 3.34  | 6.83  | ND    | 3.40  | 5.61  | 5.88 | 5.75  | 11                    | 63                 | M         | NSCLC                   | 100   | W    |
| 85       | LC        | 4.41 | 3.99  | 2.94 | 2.59  | 4.36  | 5.36 | 3.04 | 3.61  | 6.08  | 4.00  | 2.91  | 4.68  | 5.18 | 4.26  | 10                    | 73                 | F         | SQ                      | 100   | W    |
| 88       | LC        | 4.49 | 3.60  | 2.62 | 2.56  | 4.59  | 5.11 | 3.18 | 3.04  | 5.84  | ND    | 2.75  | 4.38  | 5.28 | 4.20  | 14                    | 85                 | M         | SQ                      | 75    | W    |
| 99       | LC        | 5.32 | 4.52  | 3.41 | 2.97  | 5.15  | 5.95 | 3.32 | 3.74  | 6.98  | 3.83  | 3.90  | 5.08  | 5.97 | 4.67  | 9                     | 63                 | M         | NSCLC                   | 45    | W    |
| 118      | LC        | 4.38 | 4.08  | 2.45 | 3.08  | 4.23  | 4.90 | 3.58 | 3.68  | 6.23  | 3.60  | 2.65  | 4.64  | 5.23 | 3.79  | 11                    | 72                 | M         | SQ                      | 30    | W    |
| 146      | LC        | 4.49 | 4.08  | 2.36 | 2.43  | 4.79  | 5.61 | 4.46 | 2.67  | 6.30  | 3.85  | 4.20  | 4.82  | 5.23 | 4.81  | 11                    | 64                 | F         | SCLC                    | 45    | W    |
| 147      | LC        | 4.79 | 4.11  | ND   | 3.04  | 4.26  | 5.61 | 3.40 | 2.86  | 5.94  | 3.23  | 3.11  | 4.36  | 5.81 | 4.87  | 8                     | 76                 | M         | SCLC                    | 75    | W    |
| 158      | LC        | 4.34 | 3.94  | 2.28 | 2.18  | 4.11  | 4.41 | 3.41 | 3.67  | 6.36  | 3.46  | 3.08  | 4.36  | 4.57 | 4.36  | 12                    | 88                 | M         | SCLC                    | 115.5 | W    |
| 167      | LC        | 4.95 | 3.96  | 2.62 | 2.45  | 4.61  | 5.28 | 3.40 | 3.26  | 6.38  | 4.15  | 3.36  | 4.98  | 5.60 | 4.45  | 7                     | 60                 | F         | NSCLC                   | 50    | W    |
| 171      | LC        | 5.72 | 4.59  | 3.51 | 2.80  | 5.20  | 6.20 | 3.23 | 3.60  | 6.89  | 3.78  | 3.81  | 5.40  | 6.15 | 4.78  | 9                     | 67                 | M         | SCLC                    | 100   | W    |
| 191      | LC        | 4.30 | 4.38  | 2.18 | 2.53  | 4.08  | 5.65 | 3.28 | 2.40  | 6.23  | 3.56  | 2.75  | 4.32  | 5.20 | 4.32  | 12                    | 75                 | M         | SQ                      | 54    | W    |
| 211      | LC        | 4.92 | 4.04  | 2.81 | 2.51  | 4.96  | 5.78 | 4.23 | 2.11  | 7.00  | 3.74  | 3.61  | 4.38  | 5.85 | 4.92  | 11                    | 71                 | M         | SQ                      | 50    | W    |
| 212      | LC        | 4.53 | 4.45  | 2.78 | 2.48  | 4.56  | 4.81 | 3.20 | 3.04  | 6.60  | 3.91  | 2.98  | 4.88  | 4.97 | 4.56  | 10                    | 65                 | M         | SQ                      | 67.5  | W    |
| 247      | LC        | 4.89 | 3.88  | 2.81 | 3.43  | 4.11  | 5.36 | 2.30 | 3.32  | 6.11  | 3.85  | 3.04  | 4.38  | 5.11 | 4.04  | 12                    | 75                 | F         | SQ                      | 50    | W    |
| 255      | LC        | 5.04 | 4.04  | 2.79 | 3.08  | 5.58  | 6.11 | 3.86 | 3.40  | 6.45  | 4.58  | 3.91  | 5.04  | 6.45 | 5.00  | 11                    | 60                 | F         | NSCLC                   | 30    | W    |
| 259      | LC        | 4.67 | 3.81  | 2.71 | 2.58  | 4.90  | 6.48 | 3.77 | 3.85  | 6.96  | 3.71  | 3.71  | 5.04  | 5.70 | 4.32  | 8                     | 68                 | M         | CS                      | 137.5 | W    |
| 271      | LC        | 4.96 | 3.82  | 3.15 | ND    | 5.18  | 5.87 | 2.98 | 3.41  | 6.38  | 3.57  | 3.49  | 4.85  | 5.80 | 4.48  | 7                     | 58                 | M         | AC                      | 94.5  | W    |
| 287      | LC        | 4.67 | 4.04  | 1.98 | 2.04  | 4.61  | 5.76 | 3.94 | 3.36  | 6.28  | 4.18  | 2.80  | 4.94  | 5.08 | 4.52  | 8                     | 65                 | F         | NSCLC                   | 50    | W    |
| 300      | LC        | 4.53 | 3.64  | 2.61 | 3.00  | 4.41  | 5.43 | 3.18 | 3.70  | 6.57  | 3.85  | 3.28  | 4.83  | 5.51 | 4.11  | 10                    | 56                 | M         | SQ                      | 34    | W    |
| 306      | LC        | 4.57 | 3.83  | 2.69 | 2.51  | 4.61  | 5.62 | 2.30 | 3.36  | 6.34  | ND    | 3.68  | 4.75  | 6.04 | 4.28  | 9                     | 46                 | M         | SQ                      | 30    | W    |
| 314      | LC        | 4.72 | 3.97  | 2.68 | 2.72  | 4.49  | 5.20 | 3.57 | 3.04  | 6.08  | 2.28  | 3.18  | 4.43  | 5.43 | 4.53  | 9                     | 69                 | F         | BC                      | 0     | W    |
| 329      | LC        | 4.90 | 3.54  | 2.38 | ND    | 5.18  | 5.36 | 3.95 | 3.72  | 6.86  | 3.89  | 3.15  | 4.76  | 5.95 | 4.68  | 11                    | 76                 | F         | PD                      | 38    | W    |
| 335      | LC        | 4.68 | 3.57  | 3.34 | 2.49  | 4.52  | 5.61 | 3.81 | 3.85  | 6.63  | 2.26  | 3.85  | 4.84  | 5.72 | 4.64  | 7                     | 75                 | M         | SCLC                    | 58    | A.A. |
| B3       | LC        | 4.53 | 3.97  | 2.15 | 2.45  | 4.61  | 5.60 | 3.51 | 2.58  | 6.20  | 3.89  | 3.26  | 4.26  | 5.41 | 4.23  | 10                    | 63                 | M         | SQ                      | 60    | W    |
| 63       | NLC       | 4.30 | 3.81  | 2.43 | 2.04  | 4.63  | 5.92 | 3.18 | 3.59  | 6.28  | ND    | 3.49  | 5.23  | 5.20 | 4.32  | 9                     | 77                 | M         |                         | 75    | W    |
| 64       | NLC       | 4.40 | 4.23  | 3.30 | 1.91  | 5.30  | 5.64 | 2.49 | 3.41  | 6.54  | 3.81  | 3.30  | 5.20  | 5.81 | 4.62  | 5                     | 47                 | F         |                         | 45    | W    |
| 136      | NLC       | 3.46 | 3.32  | 2.85 | 1.75  | 4.28  | 5.30 | 2.72 | 3.34  | 5.72  | ND    | 2.95  | 4.51  | 4.72 | 3.64  | 11                    | 38                 | M         |                         | 25    | A.A. |
| 139      | NLC       | 5.79 | 4.53  | 4.36 | 3.59  | 5.66  | 6.26 | 3.51 | 3.92  | 7.51  | ND    | 4.45  | 5.92  | 6.34 | 5.20  | 12                    | 44                 | F         |                         | 17.5  | W    |
| 150      | NLC       | 4.54 | 3.87  | 2.20 | 2.84  | 4.86  | 5.32 | 3.45 | 3.04  | 6.18  | ND    | 3.49  | 4.49  | 5.30 | 4.49  | 7                     | 70                 | F         |                         | 45    | W    |
| 156      | NLC       | 4.18 | 4.08  | 2.88 | 2.46  | 4.48  | 5.68 | 3.59 | 3.81  | 6.46  | ND    | 3.69  | 4.76  | 5.11 | 4.40  | 7                     | 46                 | F         |                         | 0     | A.A. |
| 157      | NLC       | 5.54 | 4.61  | 3.49 | 3.20  | 5.32  | 6.38 | 3.30 | 3.52  | 7.26  | 3.93  | 3.56  | 5.56  | 6.26 | 5.23  | 9                     | 60                 | M         |                         | 100   | W    |
| 194      | NLC       | 4.65 | 4.32  | 2.46 | 2.64  | 4.95  | 5.73 | 3.60 | 3.04  | 6.89  | 3.89  | 3.51  | 4.98  | 5.76 | 5.38  | 5                     | 57                 | M         |                         | 3     | W    |
| 210      | NLC       | 4.88 | 4.32  | 2.88 | 2.89  | 4.86  | 5.51 | 3.52 | 3.41  | 6.59  | 3.26  | 3.57  | 4.86  | 5.52 | 4.46  | 2                     | 40                 | M         |                         | 34    | W    |
| 257      | NLC       | 5.00 | 4.26  | 2.43 | 2.88  | 4.87  | 5.80 | 3.40 | 2.08  | 6.45  | 3.94  | 3.46  | 4.36  | 5.08 | 4.69  | 6                     | 69                 | F         |                         | 20    | W    |
| 261      | NLC       | 4.64 | 4.11  | 2.40 | 2.66  | 5.11  | 5.88 | 3.67 | 3.87  | 6.49  | 3.18  | 3.26  | 5.08  | 5.65 | 4.86  | 7                     | 73                 | F         |                         | 0     | W    |
| 282      | NLC       | 4.61 | 4.08  | 2.73 | 2.91  | 4.60  | 5.66 | 3.40 | 3.36  | 6.28  | 4.18  | 3.11  | 4.81  | 5.65 | 4.49  | 5                     | 83                 | F         |                         | 60    | W    |
| 285      | NLC       | 4.57 | 3.64  | 3.40 | 3.89  | 4.20  | 5.63 | 3.72 | 2.79  | 6.54  | 3.86  | 3.96  | 4.48  | 5.36 | 4.30  | 7                     | 69                 | F         |                         | 0     | W    |
| 296      | NLC       | 4.84 | 4.00  | 3.00 | 2.23  | 4.85  | 5.91 | 3.18 | 3.61  | 6.56  | 3.91  | 3.65  | 5.30  | 5.73 | 4.72  | 3                     | 43                 | F         |                         | 20    | W    |
| 305      | NLC       | 4.30 | 2.96  | 2.79 | 2.45  | 4.11  | 5.15 | 2.81 | 3.51  | 6.20  | ND    | 2.84  | 4.61  | 5.26 | 3.76  | 12                    | 50                 | F         |                         | 40    | W    |
| 315      | NLC       | 4.67 | 4.11  | 3.08 | 3.38  | 4.79  | 5.62 | 3.88 | 3.49  | 6.90  | 3.86  | 3.63  | 4.86  | 5.65 | 4.58  | 3                     | 64                 | M         |                         | 0     | W    |
| 330      | NLC       | 4.56 | 3.38  | 2.60 | 3.23  | 4.45  | 5.08 | 3.30 | 3.54  | 6.04  | 1.49  | 3.11  | 4.46  | 5.36 | 4.23  | 10                    | 39                 | M         |                         | 0     | W    |
| 331      | NLC       | 4.93 | 4.11  | 2.90 | 2.81  | 4.79  | 5.79 | 3.53 | 3.56  | 6.86  | 4.00  | 3.26  | 5.08  | 6.11 | 4.76  | 4                     | 68                 | F         |                         | 0     | N/A  |
| 334      | NLC       | 4.89 | 3.79  | 3.04 | 3.11  | 4.71  | 5.81 | 3.60 | 4.23  | 6.57  | 3.66  | 3.48  | 4.83  | 5.77 | 4.41  | 4                     | 51                 | M         |                         | 50    | W    |
| 336      | NLC       | 4.95 | 3.92  | 3.45 | 3.49  | 4.98  | 5.67 | 3.43 | 3.20  | 6.53  | 4.08  | 3.92  | 4.79  | 5.73 | 5.08  | 4                     | 31                 | F         |                         | 0     | W    |
| 337      | NLC       | 4.81 | 3.97  | 3.04 | 3.11  | 4.62  | 5.45 | 3.45 | 3.63  | 6.18  | 3.72  | 3.75  | 4.69  | 5.52 | 4.64  | 7                     | 32                 | M         |                         | 22    | N/A  |
| 339      | NLC       | 4.70 | 3.51  | 2.72 | 2.89  | 4.51  | 5.49 | 4.20 | 3.04  | 6.54  | 3.82  | 3.30  | 4.82  | 5.38 | 4.34  | 7                     | 59                 | M         |                         | 50    | W    |
| 361      | NLC       | 4.83 | 4.40  | 2.83 | 3.45  | 4.67  | 5.57 | 2.92 | 3.11  | 6.89  | 3.49  | 3.43  | 4.68  | 5.81 | 4.89  | 7                     | 73                 | F         |                         | 0     | H    |
| 363      | NLC       | 4.88 | 4.23  | 3.15 | 2.86  | 4.86  | 5.79 | 3.43 | 3.30  | 6.91  | 4.00  | 3.38  | 4.99  | 5.65 | 4.56  | 2                     | 50                 | M         |                         | 20    | A.A. |

Risk Test Value (RTV) as determined in the methods portion of this paper; NSCLC = Non-Small Cell Lung Cancer; SQ = Squamous Carcinoma; SCLC = Small Cell Lung Cancer; BC = Bronchogenic carcinoma histology not specified; AC = Adenocarcinoma; NS = Non-smoker; W = Caucasian; AA = African-American; H = Hispanic
