# Supplementary material
Source: PubMed Central journal article supplement (PMC2783591)
Supplement: NIHMS147990-supplement-4.pdf [file NIHMS147990-supplement-4.pdf]

Case-Control Set 2

LC = Lung Cancer  
 NLC = non-Lung Cancer  
 ND = No data

Transcript abundance measurements performed by Gene  
 Express Inc. <http://www.geneexpressinc.com/>

\*\*\* Units are in Log base 10 transformed target transcript molecules per 10<sup>6</sup> ACTB transcript molecules

| SUBJECT# | Diagnosis | CAT  | CEBPG | E2F1 | ERCC4 | ERCC5 | GPX1 | GPX3 | GSTM3 | GSTP1 | GSTT1 | GSTZ1 | MGST1 | SOD1 | XRCC1 | Risk Test Value (RTV) | Age (Year) | Gender | Histology | Smoking | Race |
|----------|-----------|------|-------|------|-------|-------|------|------|-------|-------|-------|-------|-------|------|-------|-----------------------|------------|--------|-----------|---------|------|
| 67       | LC        | 4.84 | 4.37  | 3.45 | 3.15  | 4.78  | 5.78 | 3.48 | 3.69  | 6.51  | ND    | 3.79  | 4.86  | 5.45 | 4.59  | 8                     | 43         | M      | BC        |         |      |
| 89       | LC        | 5.04 | 4.06  | 3.08 | 3.08  | 4.65  | 5.55 | 3.81 | 3.00  | 6.42  | 4.02  | 3.53  | 4.77  | 5.41 | 4.65  | 5                     | 60         | F      | NSCLC     | 40      | W    |
| 232      | LC        | 4.98 | 4.29  | 3.75 | ND    | 4.81  | 6.01 | 3.25 | 3.63  | 6.50  | 3.62  | 3.87  | 4.91  | 5.02 | 4.27  | 9                     | 62         | M      | SQ        | 0       | W    |
| 288      | LC        | 4.94 | 4.44  | 3.27 | 2.51  | 5.49  | 5.84 | 2.67 | 3.09  | 6.62  | 4.08  | 3.68  | 5.23  | 5.41 | 4.18  | 8                     | 60         | M      | NSCLC     |         | W    |
| 282      | LC        | 4.92 | 4.04  | 3.33 | ND    | 5.03  | 6.10 | ND   | 3.55  | 7.02  | ND    | 4.04  | 5.08  | 5.37 | 4.57  | 10                    | 52         | M      | SQ        |         | W    |
| 338      | LC        | 5.36 | 4.93  | 4.02 | ND    | 5.23  | 7.04 | 3.43 | 3.12  | 7.70  | 4.73  | 4.61  | 5.52  | 6.37 | 4.93  | 12                    | 45         | F      | BC        | 60      | W    |
| 380      | LC        | 4.93 | 4.47  | 3.42 | 3.19  | 5.02  | 5.76 | 3.61 | 2.33  | 6.50  | ND    | 3.75  | 4.97  | 5.75 | 4.37  | 9                     | 47         | M      | SQ        | 60      | W    |
| 418      | LC        | 5.15 | 4.44  | 3.16 | 2.52  | 4.62  | 6.22 | 3.72 | 4.26  | 7.02  | 4.79  | 3.94  | 5.20  | 6.05 | 4.78  | 12                    | 80         | M      | NSCLC     | 50      | W    |
| 423      | LC        | 6.27 | 5.85  | 4.56 | 4.97  | ND    | ND   | ND   | 6.64  | ND    | 4.46  | 4.46  | 6.53  | 6.72 | 3.67  | 14                    | 88         | M      | SCLC      | 80      | W    |
| 572      | LC        | 5.13 | 4.12  | 3.10 | 2.75  | 4.92  | 5.73 | 3.23 | 3.00  | 6.55  | ND    | 3.37  | 4.90  | 5.60 | 4.44  | 5                     | 74         | M      | AC        | 1       | W    |
| 574      | LC        | 5.17 | 4.56  | 3.67 | 3.34  | ND    | ND   | 3.22 | 3.74  | 6.61  | ND    | 3.87  | 5.21  | 5.45 | 4.63  | 14                    | 63         | M      | NSCLC     | 10      | A.A. |
| 650      | LC        | 4.86 | 4.03  | 2.45 | 2.89  | 4.81  | 5.49 | 3.79 | 3.79  | 6.52  | 4.08  | 3.63  | 5.25  | 5.74 | 4.19  | 9                     | 56         | F      | NSCLC     | 30      | A.A. |
| 652      | LC        | 4.81 | 3.86  | 2.80 | 2.29  | 4.08  | 5.37 | 3.72 | 2.79  | 6.03  | ND    | 3.05  | 4.66  | 5.05 | 3.96  | 10                    | 75         | M      | NSCLC     | 40      | W    |
| 670      | LC        | 4.99 | 4.25  | 3.26 | 3.27  | 5.16  | 5.83 | 3.31 | 3.02  | 6.66  | 3.65  | 3.79  | 4.66  | 5.54 | 4.96  | 6                     | 66         | M      | NSCLC     | 30      | W    |
| 676      | LC        | 4.82 | 4.16  | 2.95 | 2.63  | 4.76  | 5.49 | 3.64 | 3.01  | 6.47  | 4.03  | 3.46  | 4.57  | 5.37 | 4.19  | 9                     | 74         | F      | NSCLC     | 35      | W    |
| 677      | LC        | 5.12 | 4.71  | 3.47 | 2.87  | 4.73  | 5.83 | ND   | 2.99  | 6.38  | 3.92  | 3.14  | 4.73  | 5.13 | 4.85  | 7                     | 65         | M      | SCLC      | 75      | W    |
| 698      | LC        | 4.93 | 3.83  | 2.84 | 2.90  | 4.25  | 5.84 | 3.06 | 3.14  | 6.22  | 3.85  | 3.49  | 4.33  | 5.05 | 4.77  | 9                     | 66         | M      | NSCLC     | 60      | W    |
| 701      | LC        | 5.03 | 4.33  | 3.17 | 3.32  | 5.04  | 5.80 | 3.77 | 3.62  | 6.59  | 4.06  | 3.81  | 4.53  | 5.42 | 4.62  | 9                     | 75         | M      | SQ        | 125     | W    |
| 62       | NLC       | 4.63 | 4.43  | 4.24 | 2.83  | 5.01  | 5.84 | ND   | 3.43  | 6.72  | 3.37  | 3.44  | 5.11  | 5.12 | 4.35  | 4                     | 58         | F      |           | 64      | W    |
| 128      | NLC       | 5.40 | 4.81  | 3.37 | 3.31  | 5.48  | 5.93 | 3.38 | 3.74  | 6.59  | 3.74  | 3.83  | 5.24  | 5.72 | 4.74  | 11                    | 50         | F      |           | 40      | A.A. |
| 141      | NLC       | 4.93 | 4.36  | 2.85 | 3.13  | 4.88  | 5.82 | ND   | 3.28  | 6.22  | 3.57  | 3.18  | 4.52  | 5.19 | 4.14  | 7                     | 69         | M      |           |         | W    |
| 273      | NLC       | 5.25 | 4.53  | 3.17 | 2.94  | 5.24  | 5.63 | 3.60 | 2.91  | 6.74  | 3.86  | 3.66  | 5.06  | 5.61 | 4.83  | 7                     | 60         | F      |           |         | W    |
| 292      | NLC       | 4.75 | 4.10  | 3.49 | 2.17  | 4.89  | 5.78 | 3.15 | 3.76  | 6.54  | 4.15  | 3.81  | 5.18  | 5.54 | 4.42  | 8                     | 19         | F      |           |         | W    |
| 303      | NLC       | 5.04 | 3.92  | 3.47 | 2.82  | 4.64  | 5.58 | 3.85 | 3.44  | 6.58  | 3.84  | 3.62  | 5.02  | 5.44 | 4.29  | 5                     | 60         | M      |           |         | A.A. |
| 344      | NLC       | 5.06 | 4.42  | 3.42 | 2.97  | 4.96  | 5.76 | 3.41 | 3.42  | 6.34  | 3.88  | 3.67  | 5.02  | 5.39 | 4.71  | 2                     | 51         | F      |           |         | W    |
| 399      | NLC       | 4.81 | 4.18  | 3.29 | 2.89  | 5.04  | 5.83 | 3.56 | 3.62  | 6.53  | 3.23  | 3.88  | 4.93  | 5.37 | 4.36  | 5                     | 44         | F      |           |         | W    |
| 413      | NLC       | 4.73 | 3.96  | 3.11 | 2.73  | 4.66  | 5.73 | 3.20 | 2.73  | 6.23  | ND    | 3.57  | 4.66  | 5.20 | 4.47  | 5                     | 70         | F      |           |         | W    |
| 417      | NLC       | 4.86 | 4.13  | 3.34 | 2.70  | 5.11  | 5.82 | 3.37 | 3.28  | 6.53  | ND    | 3.62  | 4.55  | 5.09 | 4.16  | 5                     | 31         | M      |           |         | W    |
| 443      | NLC       | 5.32 | 4.20  | 3.11 | 3.01  | 5.07  | 5.74 | 3.92 | 3.57  | 6.78  | 4.17  | 3.93  | 5.26  | 5.55 | 4.44  | 8                     | 41         | M      |           |         | W    |
| 453      | NLC       | 4.78 | 4.29  | 3.30 | 2.59  | 5.01  | 5.76 | 3.37 | 3.72  | 6.70  | 3.85  | 3.83  | 4.83  | 5.63 | 4.30  | 4                     | 63         | F      |           |         | W    |
| 532      | NLC       | 4.94 | 4.33  | 2.90 | 2.93  | 4.91  | 5.66 | 3.72 | 2.54  | 6.61  | 4.07  | 3.79  | 4.72  | 5.51 | 4.36  | 7                     | 80         | F      |           |         | W    |
| 565      | NLC       | 5.18 | 4.22  | 3.21 | 2.86  | 4.65  | 5.56 | 3.47 | 2.89  | 6.35  | 3.78  | 3.39  | 4.78  | 5.31 | 4.51  | 2                     | 72         | F      |           |         | W    |
| 591      | NLC       | 5.07 | 4.44  | 3.53 | 3.00  | 5.08  | 5.74 | 3.75 | 3.12  | 6.51  | 3.93  | 3.64  | 4.94  | 5.71 | 4.45  | 5                     | 75         | M      |           |         | W    |
| 649      | NLC       | 4.70 | 4.19  | 3.16 | 2.84  | 4.66  | 5.50 | 3.41 | 2.91  | 6.38  | 3.73  | 3.59  | 4.69  | 5.39 | 4.21  | 2                     | 67         | F      |           |         | W    |
| 653      | NLC       | 4.72 | 4.13  | 2.66 | 2.81  | 4.50  | 5.36 | 3.45 | 2.35  | 6.00  | 3.98  | 3.45  | 4.33  | 5.18 | 4.35  | 6                     | 82         | F      |           |         | W    |
| 664      | NLC       | 4.81 | 4.09  | 3.19 | 2.32  | 4.64  | 5.56 | 2.97 | 2.86  | 6.17  | 3.73  | 3.29  | 4.45  | 5.40 | 4.26  | 4                     | 62         | M      |           |         | W    |
| 667      | NLC       | 4.94 | 4.26  | 2.98 | 3.16  | 4.92  | 5.54 | 3.46 | 2.57  | 6.34  | 3.71  | 3.53  | 4.63  | 5.36 | 4.53  | 3                     | 55         | F      |           |         | W    |
| 671      | NLC       | 5.01 | 4.35  | 3.10 | 3.00  | 4.99  | 5.57 | 3.37 | 3.46  | 6.47  | 3.86  | 3.50  | 4.88  | 5.66 | 4.44  | 3                     | 70         | M      |           |         | W    |
| 674      | NLC       | 4.64 | 3.89  | 2.68 | 2.10  | 4.32  | 5.35 | 3.73 | 3.99  | 6.08  | 3.81  | 3.28  | 4.75  | 4.99 | 4.09  | 9                     | 56         | F      |           |         | W    |
| 682      | NLC       | 4.26 | 4.00  | 4.00 | 2.37  | 4.67  | 5.59 | 3.38 | 3.20  | 6.23  | 3.52  | 3.72  | 4.99  | 5.25 | 4.21  | 3                     | 32         | F      |           |         | W    |

Risk Test Value (RTV) as determined in the methods portion of this paper; NSCLC = Non-Small Cell Lung Cancer; SQ = Squamous Carcinoma; SCLC = Small Cell Lung Cancer; BC = Bronchogenic carcinoma histology not specified; AC = Adenocarcinoma; NS = Non-smoker; W = Caucasian; AA = African-American; H = Hispanic
