# Supplementary material
Source: PubMed Central journal article supplement (PMC2783591)
Supplement: NIHMS147990-supplement-5.pdf [file NIHMS147990-supplement-5.pdf]

**Case-Control Set 1 Cut-points**

|                     | <b>CAT</b> | <b>CEBPG</b> | <b>E2F1</b> | <b>ERCC4</b> | <b>ERCC5</b> | <b>GPX1</b> | <b>GPX3</b> | <b>GSTM3</b> | <b>GSTP1</b> | <b>GSTT1</b> | <b>GSTZ1</b> | <b>MGST1</b> | <b>SOD1</b> | <b>XRCC1</b> |
|---------------------|------------|--------------|-------------|--------------|--------------|-------------|-------------|--------------|--------------|--------------|--------------|--------------|-------------|--------------|
| <b>lower cutoff</b> | 4.533204   | 4.11312      | 2.819898    | 2.685063325  | 4.624483     | 5.571684    | 3.301576    | 3.197169     | 6.447975     | 3.866652     | 3.290476     | 4.471452     | 5.332744    | 4.322916     |
| <b>upper cutoff</b> | 4.88233    | 4.397902     | 4.067751    | 3.886490725  | 5.026635     | 5.939128    | 3.790763    | 3.616833     | 6.686531     | 4.188031     | 3.713896     | 5.50774      | 5.83795     | 4.802597     |

**Case-Control Set 2 Cut-points**

|                     | <b>CAT</b> | <b>CEBPG</b> | <b>E2F1</b> | <b>ERCC4</b> | <b>ERCC5</b> | <b>GPX1</b> | <b>GPX3</b> | <b>GSTM3</b> | <b>GSTP1</b> | <b>GSTT1</b> | <b>GSTZ1</b> | <b>MGST1</b> | <b>SOD1</b> | <b>XRCC1</b> |
|---------------------|------------|--------------|-------------|--------------|--------------|-------------|-------------|--------------|--------------|--------------|--------------|--------------|-------------|--------------|
| <b>lower cutoff</b> | 4.300351   | 3.980883     | 2.895288    | 2.242262419  | 4.73174      | 5.535638    | 3.359472    | 2.878947     | 6.005649     | 3.274755     | 3.193034     | 4.454173     | 5.110652    | 4.158784     |
| <b>upper cutoff</b> | 4.812573   | 4.436626     | 3.567878    | 3.131684116  | 5.099258     | 5.789786    | 3.58766     | 3.523066     | 6.436809     | 3.939754     | 3.740383     | 5.153154     | 5.444716    | 4.564265     |

Lower and upper cut-offs best separating cancer from non-cancer individuals. Values reported are in units of target gene transcript molecules per  $10^6$   $\beta$ -actin transcript molecules.

Cut-points determined by Cutpointmapper.pl and Cutpointcondenser.pl PERL scripts. See Supplementary Files.

\*\*\* Units are in Log base 10 transformed target transcript molecules per  $10^6$  ACTB transcript molecules
