# Supplementary material
Source: PubMed Central journal article supplement (PMC2783591)
Supplement: NIHMS147990-supplement-6.pdf [file NIHMS147990-supplement-6.pdf]

cutpointmapper.pl

```
#!/usr/bin/env perl -w
use Math::Complex;

#Perform Leave-five out analysis to determine two cutpoints on the following genes
for $gene (qw/ CEBPG E2F1 CAT ERCC4 ERCC5 GPX1 GPX3 GSTM3 GSTP1 GSTT1 GSTZ1 MGST1
SOD1 XRCC1 /) {

#Set the number of total gene expression measurements for each gene that will be
iterated through

if ($gene eq 'CEBPG' or $gene eq 'CAT' or $gene eq 'ERCC5' or $gene eq 'GPX1' or
$gene eq 'GPX3' or $gene eq 'GSTM3' or $gene eq 'GSTP1' or $gene eq 'GSTZ1' or $gene
eq 'MGST1' or $gene eq 'SOD1' or $gene eq 'XRCC1') {
    $individual count = 49; #number of gene expression measurements for these genes
} elsif ($gene eq 'E2F1') {
    $individual count = 48; #number of gene expression measurements for this gene
} elsif ($gene eq 'ERCC4') {
    $individual count = 47; #number of gene expression measurements for this gene
} elsif ($gene eq 'GSTT1') {
    $individual count = 39; #number of gene expression measurements for this gene
}

#Open the data file containing gene expression measurements and binary class 0 =
non-cancer and 1 = cancer
open GENEDATASET, "<$gene.csv";
my @genedataset = ();
while (my $line2 = <GENEDATASET>) { #push the genedataset into an array
    chomp ($line2);
    my @tmp = split(", ", $line2);
    push @genedataset, [@tmp];
}
close GENEDATASET;

#Open a file that contains a combinatorial list of all possible combinations of
leaving five out for the data set (created using combinatorial.pl algorithm)

open LEAVEFIVEOUT, "<combinatorial $individual count-5";
open OUTPUT, ">$gene.txt";
while (my $line = <LEAVEFIVEOUT>) { #iterate through this combinatorial file to
find which five to leave out during each iteration
    chomp ($line); #Set or re-set all the variables that can possibly be used during
this iteration
    my @vallist = ();
    my @trainingset = ();
    my @validationset = ();
    my $cancersum = 0;
    my $noncancersum = 0;
    my $FP = 0.5*($individual count-5);
    my $TP = 0.5*($individual count-5);
    my $FN = 0;
    my $TN = 0;
    my @maxima = ();
    $maxima[0] = 0;
    $maxima[1] = -100;
    my @minima = ();
    $minima[0] = 0;
    $minima[1] = 100;
    $BCIerrormax = 0;
    $BCIerrormin = 0;
    $BCIerrormaxmin = 0;
}
```

cutpointmapper.pl

```

$NBCIerrormax = 0;
$NBCIerrormin = 0;
$NBCIerrormaxmin = 0;

@vallist = split(",", $line); # set the array for the five individuals (0-4) to
be stored for later validation, or to just be left out of cut-point analysis.

for ($x = 1; $x <$individual count + 1; $x++) { # split the generatedataset into
training and validation/leave-out sets.
    if ($x == $vallist[0] or $x == $vallist[1] or $x == $vallist[2] or $x ==
$vallist[3] or $x == $vallist[4]) {
        $xlow = $x - 1;
        push @validationset, $generatedataset[$xlow];
    } else {
        $xlow = $x - 1;
        push @trainingset, $generatedataset[$xlow];
    }
}

for ($x = 0; $x < $#trainingset + 1; $x++) { # count the number of individuals
with cancer in the training set
    $cancersum = $cancersum + $trainingset[$x][1];
}

$noncancersum = $individual count - $cancersum - 5; # infer the number of
individuals without cancer in the training set

for ($x = 0; $x < $#trainingset + 1; $x++) { # create the simple moving average (n
= 5) and input it into the trainingset array
    my $individual sum = 0; #reset a variable
    my $numberofindividuals = 0; # reset a variable

    #Count the number of individuals to be averaged over. Normally n = 5, but in
the extremes, cannot average n=5.
    if ($x < 2) {
        my $xlow = 0;
        my $xhigh = $x + 2;
        $numberofindividuals = $xhigh - $xlow;
        for ($y = $xlow; $y <$xhigh + 1; $y++) {
            $individual sum = $individual sum + $trainingset[$y][1];
        }
    } else if ($x > $#trainingset - 2) {
        my $xlow = $x - 2;
        my $xhigh = $#trainingset;
        $numberofindividuals = $xhigh - $xlow;
        for ($y = $xlow; $y <$xhigh + 1; $y++) {
            $individual sum = $individual sum + $trainingset[$y][1];
        }
    } else {
        my $xlow = $x - 2;
        my $xhigh = $x + 2;
        $numberofindividuals = $xhigh - $xlow;
        for ($y = $xlow; $y <$xhigh + 1; $y++) {
            $individual sum = $individual sum + $trainingset[$y][1];
        }
    }
}

$numberofindividuals = $numberofindividuals + 1;

# for each gene expression value in the ordered array, determine the
normalized sum of cancer and non-cancer individuals. Normalized on a fractional
scale of 0 to 1 for both.

```

cutpointmapper.pl

```

$BCI sum =
((($i ndi vi dual sum)/($numberofi ndi vi dual s-$i ndi vi dual sum+($i ndi vi dual sum*($noncancersu
m/$cancersum))))*($noncancersum/$cancersum);
$NBCI sum = 1 - $BCI sum;

# input the simple moving average values for each individual into the array
$strainingset[$x][2] = $BCI sum;
$strainingset[$x][3] = $NBCI sum;
# determine ROC data points
$strainingset[$x][4] = $TP;
$strainingset[$x][6] = $FP;
$TN = 0.5*($i ndi vi dual count-5) - $FP;
$FN = 0.5*($i ndi vi dual count-5) - $TP;
$strainingset[$x][5] = $TN;
$strainingset[$x][7] = $FN;
$strainingset[$x][8] = $TP/($TP+$FN); # Sensitivity or true positive rate
$strainingset[$x][9] = $FP/($FP+$TN); # 1 - Specificity or false positive rate
$strainingset[$x][10] = $strainingset[$x][8] - $strainingset[$x][9]; # TPR - FPR

# print "$TP $FP\n";
# print "$strainingset[$x][0] and $strainingset[$x][10]\n";

#Looking for maxima and minima in TPR - FPR inflection points
# determine which gene expression value represents the upper most cut-point
based on the maximal distance between TPR - FPR
if ($strainingset[$x][10] > $maxima[1]) {
    $maxima[0] = $strainingset[$x][0];
    $maxima[1] = $strainingset[$x][10];
}
# determine which gene expression value represents the lower most cut-point
based on the maximal distance between TPR - FPR
if ($strainingset[$x][10] < $minima[1]) {
    $minima[0] = $strainingset[$x][0];
    $minima[1] = $strainingset[$x][10];
}
$TP = $TP - $BCI sum;
$FP = $FP - $NBCI sum;
}

#print "$gene -- $i ndi vi dual count\n";

#if the upper cut-point gene expression value is greater than the lower cut-point
gene expression value than accept the pair of values and put into a list of possible
cut-points for that gene
if ($maxima[0] > $minima[0]) {
    print "$line -- $maxima[0] and $minima[0] \n";
    print OUTPUT "$maxima[0], $minima[0]\n";
}

# print "$total \n";

# print "BCI and NBCI error - - - - $line \n";
# print "Mi ni ma: $mi ni ma[0], $BCI errormin and $NBCI errormin\n";
# print "Maxi ma: $maxi ma[0], $BCI errormax and $NBCI errormax\n";
# print "Max/Mi n: $maxi ma[0] & $mi ni ma[0], $BCI errormaxmin and
$NBCI errormaxmin\n\n";
}
close LEAVEFIVEOUT
}

```

cutpointmapper.pl

# The data generated from this file can be somewhat large... feed it into the  
cutpointcondenser.pl algorithm to generate histogram data for each gene.
