# Supplementary material
Source: PubMed Central journal article supplement (PMC2783591)
Supplement: NIHMS147990-supplement-8.pdf [file NIHMS147990-supplement-8.pdf]

combinatorial creation.pl

```
#!/usr/bin/env perl -w
# use strict;

# This program creates a text file that can be fed into the cutpointmapper.pl
algorithm that has all possible combinations of leaving 5 out. Set the $genetotal
value to the number of transcript expression measurements/subjects for a given gene.

my $genetotal = 35;
my $lastvalue limit = $genetotal - 1;

open OUTPUTLIST, ">combinatorial-1";
foreach (1..$genetotal) { # Uses $_ by default
    print "$_\n";
    print OUTPUTLIST "$_\n";
}
close OUTPUTLIST;

open INPUTLIST, "<combinatorial-1";
open OUTPUTLIST, ">combinatorial-2";
while (my $lastvalue = <INPUTLIST>) {
    if ($lastvalue < $genetotal) {
        my $lastvalueplus = $lastvalue + 1;
        foreach ($lastvalue..$lastvalue limit) {
            chomp ($lastvalue);
            print "$lastvalue, $lastvalueplus\n";
            print OUTPUTLIST "$lastvalue, $lastvalueplus\n";
            $lastvalueplus = $lastvalueplus + 1;
        }
    }
}
close OUTPUTLIST;
close INPUTLIST;

open INPUTLIST, "<combinatorial-2";
open OUTPUTLIST, ">combinatorial-3";
while (my $line = <INPUTLIST>) {
    ($lastvalue) = ($line =~ /\d*\n/);
    chomp ($lastvalue);
    if ($lastvalue < $genetotal) {
        my $lastvalueplus = $lastvalue + 1;
        foreach ($lastvalue..$lastvalue limit) {
            chomp ($line);
            print "$line, $lastvalueplus\n";
            print OUTPUTLIST "$line, $lastvalueplus\n";
            $lastvalueplus = $lastvalueplus + 1;
        }
    }
}
close OUTPUTLIST;
close INPUTLIST;

open INPUTLIST, "<combinatorial-3";
open OUTPUTLIST, ">combinatorial-4";
while (my $line = <INPUTLIST>) {
    ($lastvalue) = ($line =~ /\d*\n/);
    chomp ($lastvalue);
    if ($lastvalue < $genetotal) {
```

```

                                combinatorial creation. pl
my $lastvalueplus = $lastvalue + 1;
foreach ($lastvalue..$lastvaluelimit) {
    chomp ($line);
    print "$line, $lastvalueplus\n";
    print OUTPUTLIST "$line, $lastvalueplus\n";
    $lastvalueplus = $lastvalueplus + 1;
}
}
close OUTPUTLIST;
close INPUTLIST;

```

```

open INPUTLIST, "<combinatorial-4";
open OUTPUTLIST, ">combinatorial$genetotal-5";
while (my $line = <INPUTLIST>) {
    ($lastvalue) = ($line =~ /\d*\n/);
    chomp ($lastvalue);
    if ($lastvalue < $genetotal) {
        my $lastvalueplus = $lastvalue + 1;
        foreach ($lastvalue..$lastvaluelimit) {
            chomp ($line);
            print "$line, $lastvalueplus\n";
            print OUTPUTLIST "$line, $lastvalueplus\n";
            $lastvalueplus = $lastvalueplus + 1;
        }
    }
}
close OUTPUTLIST;
close INPUTLIST;

```

# Use this last file (combinatorial\$genetotal-5) as the list to leave-5-out analysis for deriving cutoffs (cutoffmapper.pl).
